# Supplementary material for: The magnitude of sex differences in verbal episodic memory increases with social progress: Data from 54 countries across 40 years
Source: PubMed Central journal article supplement (PMC6476491; doi:10.1371/journal.pone.0214945), 2019-04-22
Supplement: pone.0214945.s001.pdf [file pone.0214945.s001.pdf]

**Table S1. Details of all studies used in the analyses.**

| Study                      | Country     | d Verbal<br>(variance) | d Other<br>(variance) | N<br>Males/<br>Females | Gender<br>Equality | Population<br>Education<br>Employment | GDP per<br>Capita |
|----------------------------|-------------|------------------------|-----------------------|------------------------|--------------------|---------------------------------------|-------------------|
| Abbs et al., 2011          | USA         | 0.42 (0.09)            |                       | 27/21                  | 0.93               | 1.12                                  | 48374             |
| Acevedo et al., 2010       | USA         | 0.84 (0.09)            | -0.34 (0.08)          | 26/24                  | 0.92               | 1.17                                  | 47002             |
| Aikins et al., 2010        | USA         | -0.13 (0.17)           |                       | 12/12                  | 0.92               | 1.17                                  | 47002             |
| Aine et al., 2005          | Australia   | 0.03 (0.24)            |                       | 10/8                   | 0.68               | 0.90                                  | 30441             |
| Albus et al., 1997         | Germany     |                        | 0.37 (0.10)           | 20/20                  | -0.52              | 0.34                                  | 30564             |
| Aliotti & Rajabiun, 1991   | USA         |                        | 0.05 (0.04)           | 47/66                  | 0.84               | 1.14                                  | 23954             |
| Allwood et al., 2006       | Sweden      |                        | 0.06 (0.05)           | 40/41                  | 1.53               | 1.35                                  | 43085             |
| Almela et al., 2012        | Spain       | 0.08 (0.05)            |                       | 43/42                  | 0.56               | 0.66                                  | 31832             |
| Amone et al., 2011         | Italy       | -0.06 (0.06)           |                       | 32/32                  | -0.11              | -0.31                                 | 35852             |
| Anderson et al., 2004      | Australia   | 0.11 (0.17)            |                       | 12/11                  | 0.68               | 0.90                                  | 23440             |
| Anderson et al., 2006      | UK          | 0.35 (0.05)            | 0.30 (0.05)           | 33/50                  | 0.57               | 0.87                                  | 40048             |
| Areh, 2011                 | Slovenia    |                        | 0.26 (0.01)           | 119/161                | 0.80               | 0.83                                  | 23439             |
| Arentoft et al., 2009      | USA         | 0.99 (0.11)            |                       | 19/21                  | 0.89               | 1.21                                  | 48401             |
| Arnold et al., 1987        | USA         | 0.60 (0.03)            |                       | 82/75                  | 0.74               | 1.12                                  | 19115             |
| Astur et al., 1998         | USA         |                        | -0.96 (0.09)          | 21/27                  | 0.66               | 1.29                                  | 31573             |
| Astur et al., 2004         | USA         |                        | -0.49 (0.07)          | 24/37                  | 0.78               | 1.21                                  | 39677             |
| Au et al., 2004            | USA         | 0.40 (0.01)            | -0.06 (0.01)          | 375/429                | 0.78               | 1.21                                  | 39677             |
| Ayesa-Arriola et al., 2014 | Spain       | 0.34 (0.03)            | -0.50 (0.03)          | 97/62                  | 0.63               | 0.68                                  | 29371             |
| Bacon & Izaute, 2009       | France      |                        | -0.21 (0.20)          | 12/9                   | 0.48               | 0.39                                  | 45413             |
| Badcock et al., 2011       | Australia   | 0.42 (0.02)            |                       | 159/101                | 1.00               | 1.09                                  | 51846             |
| Bangirana et al., 2011     | Uganda      |                        | 0.70 (0.07)           | 34/27                  | 0.28               | -0.39                                 | 609               |
| Banks et al., 1987         | USA         | 0.83 (0.08)            |                       | 23/37                  | 0.74               | 1.12                                  | 19115             |
| Barid et al., 2007         | USA         | 0.82 (0.09)            |                       | 23/28                  | 0.85               | 1.21                                  | 46437             |
| Barker-Collo et al., 2010  | New Zealand | 0.77 (0.40)            |                       | 17/17                  | 1.37               | 1.08                                  | 28201             |
| Baron et al., 2012         | USA         | 0.24 (0.03)            | 0.20 (0.03)           | 67/59                  | 0.92               | 1.08                                  | 49782             |
| Bearden et al., 2006       | USA         | 0.28 (0.11)            |                       | 15/25                  | 0.85               | 1.19                                  | 44308             |
| Beatty & Bruellman, 1987   | USA         |                        | 0.15 (0.03)           | 59/64                  | 0.74               | 1.12                                  | 19115             |

| Study                    | Country        | d Verbal<br>(variance) | d Other<br>(variance) | N<br>Males/<br>Females | Gender<br>Equality | Population<br>Education<br>Employment | GDP per<br>Capita |
|--------------------------|----------------|------------------------|-----------------------|------------------------|--------------------|---------------------------------------|-------------------|
| Becker et al., 2005      | USA            |                        | -0.04 (0.09)          | 20/33                  | 0.81               | 1.19                                  | 41922             |
| Beinhoff et al., 2008    | Germany        | 0.57 (0.08)            |                       | 28/23                  | 0.26               | 1.13                                  | 41815             |
| Bellace et al., 2013     | USA            | -0.41 (0.35)           | -0.56 (0.36)          | 5/7                    | 0.91               | 1.08                                  | 51433             |
| Bender et al., 2010      | USA            | 0.39 (0.02)            |                       | 88/183                 | 0.92               | 1.17                                  | 47002             |
| Bengner et al., 2006     | Germany        |                        | 0.48 (0.13)           | 17/15                  | 0.19               | 0.96                                  | 34697             |
| Bernardet et al., 2011   | Spain          |                        | -0.74 (0.13)          | 29/11                  | 0.50               | 0.63                                  | 30738             |
| Beydoun et al., 2013     | USA            | 0.17 (0.00)            | -0.08 (0.00)          | 938/1228               | 0.91               | 1.08                                  | 51433             |
| Bielak et al., 2012      | Australia      | 0.41 (0.00)            |                       | 3517/3635              | 1.01               | 1.10                                  | 62217             |
| Birenbaum et al., 1994   | Israel         |                        | 0.42 (0.01)           | 204/206                | 0.19               | 0.44                                  | 12531             |
| Blankevoort et al., 2013 | Netherlands    | 0.62 (0.02)            |                       | 98/122                 | 0.53               | 1.23                                  | 49475             |
| Bleecker et al., 1988    | USA            | 0.55 (0.02)            |                       | 87/109                 | 0.77               | 1.12                                  | 20101             |
| Block et al., 2009       | USA            |                        | 0.26 (0.05)           | 41/40                  | 0.89               | 1.21                                  | 48401             |
| Bloise & Johnson, 2007   | USA            | 0.29 (0.06)            |                       | 30/33                  | 0.85               | 1.21                                  | 46437             |
| Boeke et al., 2012       | USA            |                        | 0.16 (0.00)           | 441/449                | 0.92               | 1.08                                  | 49782             |
| Boeuf-Cazou et al., 2011 | France         | 0.47 (0.00)            |                       | 536/483                | 0.59               | 0.46                                  | 40706             |
| Boman, 2004              | Sweden         | 0.10 (0.04)            | 0.42 (0.04)           | 48/48                  | 1.40               | 1.19                                  | 36961             |
| Borges & Vaughn, 1977    | USA            |                        | 0.84 (0.10)           | 22/22                  | 0.47               | 1.00                                  | 8611              |
| Börsch-Supan, 2016c      | Austria        | 0.19 (0.00)            |                       | 1820/2445              | -0.29              | 0.67                                  | 48324             |
| Börsch-Supan, 2016b      | Austria        | 0.07 (0.04)            |                       | 36/62                  | -0.49              | 0.47                                  | 46587             |
| Börsch-Supan, 2016a      | Austria        | 0.06 (0.00)            |                       | 771/1057               | -0.56              | 0.32                                  | 38242             |
| Börsch-Supan, 2016d      | Austria        | -0.08 (0.02)           |                       | 100/83                 | -0.29              | 0.69                                  | 50558             |
| Börsch-Supan, 2016b      | Belgium        | 0.29 (0.01)            |                       | 147/175                | 0.42               | 0.26                                  | 44404             |
| Börsch-Supan, 2016c      | Belgium        | 0.17 (0.00)            |                       | 1296/1554              | 0.50               | 0.24                                  | 44734             |
| Börsch-Supan, 2016a      | Belgium        | 0.16 (0.00)            |                       | 1710/1955              | 0.36               | 0.21                                  | 36967             |
| Börsch-Supan, 2016d      | Belgium        | 0.13 (0.00)            |                       | 684/744                | 0.54               | 0.29                                  | 46622             |
| Börsch-Supan, 2016b      | Czech Republic | 0.15 (0.00)            |                       | 1161/1549              | 0.36               | 0.89                                  | 18334             |
| Börsch-Supan, 2016d      | Czech Republic | 0.07 (0.00)            |                       | 660/870                | 0.47               | 1.09                                  | 19814             |
| Börsch-Supan, 2016c      | Czech Republic | 0.06 (0.00)            |                       | 1962/2574              | 0.44               | 1.00                                  | 19641             |
| Börsch-Supan, 2016d      | Denmark        | 0.34 (0.00)            |                       | 879/987                | 0.89               | 1.15                                  | 60362             |
| Börsch-Supan, 2016a      | Denmark        | 0.29 (0.00)            |                       | 741/852                | 0.68               | 1.21                                  | 48817             |
| Börsch-Supan, 2016c      | Denmark        | 0.28 (0.01)            |                       | 229/213                | 0.86               | 1.18                                  | 58125             |

| Study               | Country     | d Verbal<br>(variance) | d Other<br>(variance) | N<br>Males/<br>Females | Gender<br>Equality | Population<br>Education<br>Employment | GDP per<br>Capita |
|---------------------|-------------|------------------------|-----------------------|------------------------|--------------------|---------------------------------------|-------------------|
| Börsch-Supan, 2016b | Denmark     | 0.28 (0.00)            |                       | 596/701                | 0.74               | 1.27                                  | 58501             |
| Börsch-Supan, 2016c | Estonia     | 0.27 (0.00)            |                       | 2553/3890              | 1.22               | 1.12                                  | 17491             |
| Börsch-Supan, 2016d | Estonia     | 0.20 (0.01)            |                       | 180/139                | 1.22               | 1.14                                  | 19155             |
| Börsch-Supan, 2016b | France      | 0.35 (0.00)            |                       | 417/490                | 0.43               | 0.37                                  | 41601             |
| Börsch-Supan, 2016d | France      | 0.26 (0.02)            |                       | 99/105                 | 0.60               | 0.52                                  | 42571             |
| Börsch-Supan, 2016a | France      | 0.20 (0.00)            |                       | 1289/1613              | 0.30               | 0.32                                  | 34880             |
| Börsch-Supan, 2016c | France      | 0.20 (0.00)            |                       | 1543/1911              | 0.60               | 0.49                                  | 40838             |
| Börsch-Supan, 2016c | Germany     | 0.59 (0.08)            |                       | 30/32                  | 0.35               | 1.32                                  | 44011             |
| Börsch-Supan, 2016d | Germany     | 0.19 (0.00)            |                       | 2086/2289              | 0.35               | 1.35                                  | 45601             |
| Börsch-Supan, 2016b | Germany     | 0.15 (0.00)            |                       | 465/514                | 0.26               | 1.13                                  | 41815             |
| Börsch-Supan, 2016a | Germany     | 0.10 (0.00)            |                       | 1347/1540              | 0.19               | 0.96                                  | 34697             |
| Börsch-Supan, 2016b | Greece      | -0.10 (0.00)           |                       | 435/476                | -0.26              | 0.12                                  | 28827             |
| Börsch-Supan, 2016a | Greece      | -0.04 (0.00)           |                       | 1212/1391              | -0.37              | 0.06                                  | 22552             |
| Börsch-Supan, 2016c | Hungary     | 0.06 (0.00)            |                       | 1284/1660              |                    |                                       |                   |
| Börsch-Supan, 2016b | Ireland     | 0.18 (0.00)            |                       | 494/583                | 0.89               | 0.84                                  | 61314             |
| Börsch-Supan, 2016d | Israel      | 0.16 (0.00)            |                       | 912/1156               | 0.91               | 0.95                                  | 36281             |
| Börsch-Supan, 2016a | Italy       | 0.01 (0.00)            |                       | 1117/1372              | -0.31              | -0.38                                 | 31959             |
| Börsch-Supan, 2016b | Italy       | 0.01 (0.00)            |                       | 567/587                | -0.24              | -0.35                                 | 37699             |
| Börsch-Supan, 2016c | Italy       | -0.03 (0.00)           |                       | 657/758                | -0.03              | -0.21                                 | 34814             |
| Börsch-Supan, 2016d | Italy       | -0.03 (0.00)           |                       | 814/915                | -0.02              | -0.22                                 | 35368             |
| Börsch-Supan, 2016d | Luxembourg  | 0.22 (0.00)            |                       | 731/816                | -0.03              | 0.50                                  | 113727            |
| Börsch-Supan, 2016b | Netherlands | 0.27 (0.00)            |                       | 396/451                | 0.41               | 1.14                                  | 51241             |
| Börsch-Supan, 2016a | Netherlands | 0.25 (0.00)            |                       | 1302/1488              | 0.34               | 0.98                                  | 41577             |
| Börsch-Supan, 2016d | Netherlands | 0.23 (0.00)            |                       | 805/917                | 0.53               | 1.25                                  | 51425             |
| Börsch-Supan, 2016c | Netherlands | 0.19 (0.00)            |                       | 397/453                | 0.53               | 1.23                                  | 49475             |
| Börsch-Supan, 2016c | Poland      | 0.25 (0.02)            |                       | 112/97                 | 0.52               | 0.36                                  | 13142             |
| Börsch-Supan, 2016b | Poland      | 0.09 (0.00)            |                       | 1054/1336              | 0.45               | 0.06                                  | 11248             |
| Börsch-Supan, 2016c | Portugal    | -0.07 (0.00)           |                       | 866/1093               | 0.75               | 0.04                                  | 20577             |
| Börsch-Supan, 2016d | Slovenia    | 0.19 (0.00)            |                       | 438/537                | 0.86               | 0.77                                  | 23144             |
| Börsch-Supan, 2016c | Slovenia    | 0.10 (0.00)            |                       | 1164/1483              | 0.85               | 0.77                                  | 22478             |
| Börsch-Supan, 2016c | Spain       | -0.08 (0.00)           |                       | 851/954                | 0.60               | 0.68                                  | 28648             |

| Study                    | Country     | d Verbal<br>(variance) | d Other<br>(variance) | N<br>Males/<br>Females | Gender<br>Equality | Population<br>Education<br>Employment | GDP per<br>Capita |
|--------------------------|-------------|------------------------|-----------------------|------------------------|--------------------|---------------------------------------|-------------------|
| Börsch-Supan, 2016b      | Spain       | -0.04 (0.01)           |                       | 417/390                | 0.13               | 0.49                                  | 32709             |
| Börsch-Supan, 2016a      | Spain       | -0.02 (0.00)           |                       | 967/1330               | -0.09              | 0.36                                  | 26511             |
| Börsch-Supan, 2016d      | Spain       | -0.01 (0.00)           |                       | 1543/1660              | 0.63               | 0.68                                  | 29371             |
| Börsch-Supan, 2016c      | Sweden      | 0.42 (0.04)            |                       | 53/63                  | 1.33               | 1.36                                  | 57134             |
| Börsch-Supan, 2016d      | Sweden      | 0.36 (0.00)            |                       | 1238/1351              | 1.34               | 1.43                                  | 60283             |
| Börsch-Supan, 2016a      | Sweden      | 0.31 (0.00)            |                       | 1379/1563              | 1.53               | 1.35                                  | 43085             |
| Börsch-Supan, 2016b      | Sweden      | 0.16 (0.01)            |                       | 327/360                | 1.46               | 1.33                                  | 53324             |
| Börsch-Supan, 2016b      | Switzerland | 0.29 (0.01)            |                       | 321/411                | 0.14               | 1.47                                  | 63223             |
| Börsch-Supan, 2016c      | Switzerland | 0.28 (0.00)            |                       | 1207/1345              | 0.31               | 1.79                                  | 83209             |
| Börsch-Supan, 2016d      | Switzerland | 0.25 (0.04)            |                       | 51/54                  | 0.36               | 1.80                                  | 84669             |
| Börsch-Supan, 2016a      | Switzerland | 0.16 (0.00)            |                       | 454/502                | 0.08               | 1.22                                  | 54798             |
| Bowden, 1989             | Australia   |                        | -0.84 (0.10)          | 22/22                  | 0.23               | 0.78                                  | 14261             |
| Bozikas et al., 2010     | Greece      | 0.29 (0.07)            | -0.43 (0.07)          | 31/31                  | -0.10              | 0.21                                  | 29711             |
| Bracco et al., 2011      | Italy       | -0.06 (0.06)           | -0.07 (0.06)          | 35/35                  | -0.11              | -0.31                                 | 35852             |
| Bradbard & Endsley, 1983 | USA         | -0.19 (0.13)           |                       | 18/18                  | 0.54               | 1.09                                  | 14439             |
| Bradbard et al., 1986    | USA         |                        | -0.16 (0.07)          | 31/25                  | 0.72               | 1.11                                  | 18269             |
| Brevik et al., 2013      | Norway      | 0.89 (0.04)            |                       | 42/83                  | 1.21               | 1.21                                  | 101564            |
| Brewster et al., 2011    | Canada      |                        | 0.00 (0.03)           | 34/44                  | 1.11               | 1.33                                  | 47446             |
| Brindal et al., 2012     | Australia   | 0.31 (0.10)            |                       | 19/21                  | 1.01               | 1.10                                  | 62217             |
| Bringmann et al., 1989   | USA         | -0.27 (0.06)           |                       | 35/30                  | 0.79               | 1.13                                  | 21483             |
| Brito et al., 1998       | Brazil      |                        | 0.42 (0.01)           | 199/199                | 0.50               | -0.71                                 | 5260              |
| Brodsky et al., 2003     | USA         | 0.36 (0.13)            |                       | 15/16                  | 0.73               | 1.25                                  | 38166             |
| Brønnick et al., 2011    | Norway      | 0.48 (0.02)            |                       | 95/85                  | 1.18               | 1.20                                  | 87646             |
| Brooking et al., 2012    | Brazil      | 0.36 (0.05)            | -0.13 (0.05)          | 44/46                  | 0.81               | -0.12                                 | 13039             |
| Brown et al., 2007       | USA         |                        | -0.20 (0.02)          | 91/196                 | 0.85               | 1.21                                  | 46437             |
| Bruck, 2009              | USA         |                        | 0.05 (0.14)           | 32/26                  | 0.89               | 1.21                                  | 48401             |
| Buchanan & Tranel, 2008  | USA         |                        | 0.21 (0.15)           | 20/20                  | 0.86               | 1.20                                  | 48062             |
| Buchmann et al., 2008    | Switzerland | 0.12 (0.12)            | 0.38 (0.12)           | 15/21                  | 0.14               | 1.47                                  | 63223             |
| Bücker et al., 2014      | Canada      | 0.02 (0.07)            |                       | 25/39                  | 1.12               | 1.34                                  | 52266             |
| Burdick et al., 2008     | USA         | 0.62 (0.12)            | 0.17 (0.11)           | 24/14                  | 0.86               | 1.20                                  | 48062             |
| Butts et al., 1995       | USA         | -0.18 (0.10)           |                       | 20/20                  | 0.69               | 1.21                                  | 27777             |

| Study                      | Country   | d Verbal<br>(variance) | d Other<br>(variance) | N<br>Males/<br>Females | Gender<br>Equality | Population<br>Education<br>Employment | GDP per<br>Capita |
|----------------------------|-----------|------------------------|-----------------------|------------------------|--------------------|---------------------------------------|-------------------|
| Cadar et al., 2012         | UK        | 0.31 (0.00)            |                       | 490/528                | 0.80               | 1.11                                  | 41020             |
| Cahill et al., 2001        | USA       |                        | 0.10 (0.19)           | 11/11                  | 0.65               | 1.30                                  | 36450             |
| Campeanu et al., 2013      | Canada    | 1.84 (0.45)            | -0.49 (0.35)          | 4/12                   | 1.11               | 1.33                                  | 52495             |
| Canli et al., 2002         | USA       |                        | 0.98 (0.19)           | 12/12                  | 0.69               | 1.27                                  | 37274             |
| Cánovas et al., 2011       | Spain     |                        | -0.13 (0.21)          | 8/13                   | 0.50               | 0.63                                  | 30738             |
| Cansino et al., 2012       | Mexico    | -0.04 (0.00)           | 0.05 (0.00)           | 750/750                | -0.39              | -0.36                                 | 9730              |
| Caplan & Lipman, 1995      | USA       |                        | -0.50 (0.04)          | 53/54                  | 0.69               | 1.21                                  | 27777             |
| Carlson & Sherwin, 1998    | Canada    | 0.03 (0.06)            | -0.16 (0.06)          | 31/41                  | 0.66               | 0.80                                  | 21770             |
| Carnero-Pardo et al., 2012 | Spain     | 0.14 (0.01)            |                       | 156/205                | 0.56               | 0.66                                  | 31832             |
| Carrus et al., 2010        | UK        |                        | -0.13 (0.09)          | 21/25                  | 0.74               | 1.08                                  | 37166             |
| Casella et al., 2012       | Italy     | 0.28 (0.23)            |                       | 8/10                   | -0.09              | -0.31                                 | 38332             |
| Caselli et al., 2011       | USA       | 0.72 (0.01)            |                       | 187/434                | 0.93               | 1.12                                  | 48374             |
| Cashdan et al., 2012       | Tanzania  |                        | -0.48 (0.06)          | 15/9                   |                    |                                       | 740               |
| Casiere & Ashton, 1996     | USA       |                        | 0.56 (0.10)           | 24/19                  | 0.64               | 1.24                                  | 28782             |
| Cavaliere et al., 2010     | Austria   |                        | -0.30 (0.01)          | 269/318                | -0.35              | 0.57                                  | 47654             |
| Chai & Jacobs, 2009        | USA       |                        | -0.16 (0.17)          | 26/25                  | 0.89               | 1.21                                  | 48401             |
| Chaill et al., 2001        | USA       |                        | 0.03 (0.18)           | 11/11                  | 0.65               | 1.30                                  | 36450             |
| Chapman et al., 2011       | USA       | 0.63 (0.10)            |                       | 21/21                  | 0.93               | 1.12                                  | 48374             |
| Chavez et al., 1982        | USA       |                        | 0.55 (0.08)           | 26/26                  | 0.48               | 1.08                                  | 13993             |
| Cherney, 2005              | USA       | 0.23 (0.03)            |                       | 60/60                  | 0.81               | 1.19                                  | 41922             |
| Cherney & Ryalls, 1999     | USA       | 0.13 (0.07)            | 0.83 (0.11)           | 30/30                  | 0.65               | 1.30                                  | 32949             |
| Chin & Rickard, 2010       | Australia | 0.78 (0.05)            |                       | 32/66                  | 0.97               | 1.08                                  | 42715             |
| Chipman & Kimura, 1998     | Canada    | 0.40 (0.03)            |                       | 73/72                  | 0.66               | 0.80                                  | 21770             |
| Choi & L'Hirondell, 2005   | Canada    | 0.36 (0.04)            | 0.09 (0.04)           | 50/61                  | 0.93               | 1.25                                  | 31980             |
| Choi & Silverman, 2003     | Canada    | 0.23 (0.01)            | 0.21 (0.01)           | 273/308                | 0.85               | 1.10                                  | 24168             |
| Choudhury et al., 2003     | USA       |                        | 0.48 (0.02)           | 75/156                 | 0.73               | 1.25                                  | 38166             |
| Christensen et al., 2000   | Australia | 0.05 (0.01)            |                       | 206/219                | 0.49               | 0.79                                  | 20536             |
| Christensen et al., 2001   | Australia | 0.10 (0.01)            |                       | 170/190                | 0.55               | 0.82                                  | 21665             |
| Christensen et al., 2004   | Australia | 0.12 (0.00)            | 0.04 (0.00)           | 446/427                | 0.68               | 0.90                                  | 23440             |
| Cinan et al., 2007         | Turkey    |                        | 0.21 (0.02)           | 72/74                  | -2.12              | -1.86                                 | 7727              |
| Clare et al., 2000         | UK        |                        | 0.23 (0.04)           | 39/71                  | 0.82               | 0.62                                  | 26676             |

| Study                         | Country      | d Verbal<br>(variance) | d Other<br>(variance) | N<br>Males/<br>Females | Gender<br>Equality | Population<br>Education<br>Employment | GDP per<br>Capita |
|-------------------------------|--------------|------------------------|-----------------------|------------------------|--------------------|---------------------------------------|-------------------|
| Clark & Teasdale, 1985        | UK           | 0.87 (0.07)            |                       | 32/32                  | 0.62               | 0.46                                  | 8179              |
| Cockroft & Blackburn, 2008    | South Africa | -0.38 (0.06)           |                       | 32/32                  | 0.40               | -0.77                                 | 6161              |
| Collaer & Evans, 1982         | USA          |                        | 0.19 (0.01)           | 134/138                | 0.48               | 1.08                                  | 13993             |
| Colley et al., 2002           | UK           | 0.40 (0.04)            |                       | 50/50                  | 0.82               | 0.66                                  | 25980             |
| Collie et al., 1999           | Australia    | 0.98 (0.04)            |                       | 44/92                  | 0.45               | 0.81                                  | 21340             |
| Coluccia et al., 2011         | Italy        | -0.10 (0.01)           |                       | 226/238                | -0.11              | -0.31                                 | 35852             |
| Comijs et al., 2010           | Netherlands  | 0.43 (0.00)            |                       | 551/586                | 0.48               | 1.26                                  | 51900             |
| Conde-Sala et al., 2012       | Spain        |                        | 0.09 (0.04)           | 39/73                  | 0.56               | 0.66                                  | 31832             |
| Corbeil & McKelvie, 2008      | Canada       | 0.14 (0.08)            |                       | 26/28                  | 1.04               | 1.33                                  | 44545             |
| Corrêa et al., 2012           | Brazil       |                        | 0.24 (0.61)           | 2/9                    | 0.81               | -0.12                                 | 13039             |
| Costa et al., 2013            | Portugal     | 0.04 (0.01)            |                       | 241/262                | 0.75               | 0.04                                  | 20577             |
| Cox & Waters, 1986            | USA          | 0.17 (0.03)            |                       | 60/60                  | 0.72               | 1.11                                  | 18269             |
| Crook et al., 1990            | USA          |                        | 0.40 (0.01)           | 149/298                | 0.82               | 1.14                                  | 22922             |
| Crook et al., 1993            | USA          |                        | -0.20 (0.01)          | 243/366                | 0.74               | 1.17                                  | 25493             |
| Crotty et al., 2012           | USA          | 0.31 (0.04)            | 0.11 (0.04)           | 58/50                  | 0.92               | 1.08                                  | 49782             |
| Cruse & Critchlow Leigh, 1987 | USA          | 0.29 (0.02)            |                       | 108/108                | 0.74               | 1.12                                  | 19115             |
| Cserjesi et al., 2012         | Netherlands  | 0.46 (0.03)            |                       | 58/72                  | 0.52               | 1.17                                  | 53537             |
| Curry et al., 1986            | USA          | -0.39 (0.05)           | 0.15 (0.05)           | 48/49                  | 0.72               | 1.11                                  | 18269             |
| Daalman et al., 2011          | Netherlands  | 0.85 (0.05)            | -0.13 (0.05)          | 30/71                  | 0.49               | 1.18                                  | 50341             |
| Dabbs et al., 1998            | USA          |                        | 0.11 (0.02)           | 90/104                 | 0.66               | 1.29                                  | 31573             |
| Dapрати et al., 2013          | Italy        |                        | 0.01 (0.41)           | 13/3                   | -0.03              | -0.21                                 | 34814             |
| Davey et al., 2013            | USA          | 0.01 (0.04)            |                       | 34/151                 | 0.91               | 1.08                                  | 51433             |
| Davidson, 2006                | USA          |                        | 0.05 (0.04)           | 53/53                  | 0.85               | 1.19                                  | 44308             |
| de Bartolomeis et al., 2013   | Italy        | 0.20 (0.39)            |                       | 19/3                   | -0.03              | -0.21                                 | 34814             |
| De Goede & Postma, 2008       | Netherlands  | 0.32 (0.05)            | 0.30 (0.05)           | 41/40                  | 0.41               | 1.14                                  | 51241             |
| DeFries et al., 1982          | USA          | 0.16 (0.00)            |                       | 3252/3317              | 0.48               | 1.08                                  | 13993             |
| Deloire et al., 2005          | France       | 0.18 (0.11)            | -0.12 (0.11)          | 14/30                  | 0.30               | 0.29                                  | 33875             |
| den Heijer et al., 2003       | Netherlands  | 0.14 (0.01)            |                       | 202/210                | 0.17               | 0.94                                  | 28817             |
| Dennett et al., 2012          | Australia    |                        | -0.92 (0.03)          | 60/93                  | 1.01               | 1.10                                  | 62217             |
| Dewhurst et al., 2012         | UK           | 0.43 (0.04)            |                       | 50/50                  | 0.80               | 1.11                                  | 41020             |
| Diege et al., 2010            | Sweden       | 0.35 (0.07)            |                       | 22/44                  | 1.37               | 1.29                                  | 46207             |

| Study                          | Country   | d Verbal<br>(variance) | d Other<br>(variance) | N<br>Males/<br>Females | Gender<br>Equality | Population<br>Education<br>Employment | GDP per<br>Capita |
|--------------------------------|-----------|------------------------|-----------------------|------------------------|--------------------|---------------------------------------|-------------------|
| Dingwall et al., 2010          | Australia |                        | -0.24 (0.02)          | 95/111                 | 0.97               | 1.08                                  | 42715             |
| Dodrill, 1979                  | USA       | 0.32 (0.04)            | -0.40 (0.04)          | 47/47                  | 0.45               | 1.03                                  | 10587             |
| Doty & Kerr, 2005              | USA       |                        | 1.40 (0.08)           | 30/30                  | 0.81               | 1.19                                  | 41922             |
| Drakeford et al., 2010         | UK        | 1.00 (0.44)            | 0.72 (0.43)           | 3/13                   | 0.74               | 1.08                                  | 37166             |
| Duff et al., 2010              | USA       | 0.15 (0.01)            | -0.21 (0.01)          | 300/418                | 0.92               | 1.17                                  | 47002             |
| Eals & Silverman, 1994         | Canada    | 0.04 (0.05)            | 0.48 (0.03)           | 81/82                  | 0.59               | 0.77                                  | 20017             |
| Economou, 2009                 | Greece    | -0.04 (0.01)           |                       | 140/182                | -0.21              | 0.14                                  | 31997             |
| Economou et al., 2006          | Greece    | -0.09 (0.16)           |                       | 11/16                  | -0.37              | 0.06                                  | 22552             |
| Ecuyer-Dab & Robert, 2004      | Canada    |                        | 0.31 (0.02)           | 95/121                 | 0.90               | 1.20                                  | 28172             |
| Edelstein et al., 1998         | USA       | 0.37 (0.01)            | -0.28 (0.01)          | 209/300                | 0.66               | 1.29                                  | 31573             |
| Eidelman et al., 2012          | USA       | 0.48 (0.12)            |                       | 6/10                   | 0.92               | 1.08                                  | 49782             |
| Elamin et al., 2011            | Ireland   | 0.10 (0.03)            | -0.41 (0.04)          | 55/61                  | 0.94               | 0.71                                  | 48261             |
| Elias et al., 1997             | USA       | 0.10 (0.00)            | -0.07 (0.00)          | 742/1063               | 0.65               | 1.26                                  | 30068             |
| Ellis et al., 1973             | UK        |                        | 0.98 (0.07)           | 30/30                  | 0.39               | 0.34                                  | 3030              |
| Ellis et al., 2009             | Australia | 0.37 (0.01)            | -0.22 (0.01)          | 328/440                | 0.91               | 1.08                                  | 49628             |
| Epstein, 1974                  | USA       | -0.57 (0.04)           |                       | 57/57                  | 0.52               | 0.92                                  | 6741              |
| Ernest, 1983                   | Canada    | 0.22 (0.02)            |                       | 72/137                 | 0.33               | 0.75                                  | 12440             |
| Espin et al., 2013             | Spain     | 0.64 (0.08)            |                       | 18/44                  | 0.60               | 0.68                                  | 28648             |
| Evardone & Alexander, 2009     | USA       |                        | 0.18 (0.05)           | 41/38                  | 0.89               | 1.21                                  | 48401             |
| Fein & McGillivray, 2007       | USA       | 0.21 (0.11)            | 0.10 (0.11)           | 16/23                  | 0.85               | 1.21                                  | 46437             |
| Fein et al., 2006              | USA       | 0.29 (0.08)            | 0.13 (0.08)           | 25/23                  | 0.85               | 1.19                                  | 44308             |
| Felmingham et al., 2012        | Australia | -0.41 (0.10)           |                       | 20/21                  | 1.01               | 1.10                                  | 62217             |
| Ferguson et al., 2008          | USA       |                        | 0.00 (0.06)           | 29/43                  | 0.86               | 1.20                                  | 48062             |
| Ferguson et al., 2010          | USA       |                        | 0.12 (0.02)           | 79/133                 | 0.92               | 1.17                                  | 47002             |
| Fernandez-Mendoza et al., 2009 | USA       |                        | -0.14 (0.01)          | 312/396                | 0.89               | 1.21                                  | 48401             |
| Ferree & Cahill, 2009          | USA       |                        | -0.06 (0.10)          | 16/32                  | 0.89               | 1.21                                  | 48401             |
| Fichman et al., 2010           | Brazil    | 0.26 (0.02)            |                       | 65/118                 | 0.76               | -0.02                                 | 8475              |
| File et al., 2001              | UK        | 1.05 (0.28)            |                       | 8/8                    | 0.88               | 0.65                                  | 26401             |
| Fillenbaum et al., 2011        | USA       | -0.14 (0.04)           |                       | 72/65                  | 0.93               | 1.12                                  | 48374             |
| Findlay et al., 2009           | Canada    | 0.16 (0.00)            |                       | 9477/12744             | 1.05               | 1.35                                  | 46596             |
| Fischer et al., 2007           | Sweden    |                        | 0.33 (0.19)           | 12/12                  | 1.49               | 1.30                                  | 46256             |

| Study                   | Country        | d Verbal<br>(variance) | d Other<br>(variance) | N<br>Males/<br>Females | Gender<br>Equality | Population<br>Education<br>Employment | GDP per<br>Capita |
|-------------------------|----------------|------------------------|-----------------------|------------------------|--------------------|---------------------------------------|-------------------|
| Fiske & Gatz, 2007      | Sweden         | 0.15 (0.01)            | -0.01 (0.01)          | 177/241                | 1.49               | 1.30                                  | 46256             |
| Flegr et al., 2012      | Czech Republic |                        | 0.24 (0.02)           | 100/93                 | 0.41               | 0.93                                  | 21657             |
| Foti et al., 2011       | Italy          |                        | 0.33 (0.32)           | 6/7                    | -0.11              | -0.31                                 | 35852             |
| Frasson et al., 2011    | Italy          | 0.21 (0.02)            |                       | 99/128                 | -0.11              | -0.31                                 | 35852             |
| Fried & Johanson, 2008  | USA            |                        | -0.31 (0.01)          | 134/489                | 0.86               | 1.20                                  | 48062             |
| Friedman et al., 2002   | USA            | 0.67 (0.02)            |                       | 108/129                | 0.69               | 1.27                                  | 37274             |
| Frings et al., 2006     | Germany        |                        | 0.16 (0.20)           | 10/10                  | 0.19               | 0.96                                  | 34697             |
| Friswell et al., 2008   | UK             | -0.50 (0.24)           | -0.20 (0.22)          | 9/9                    | 0.63               | 0.98                                  | 48428             |
| Fritsch et al., 2007    | USA            | 0.51 (0.05)            |                       | 104/107                | 0.85               | 1.21                                  | 46437             |
| Fuentes et al., 2012    | Canada         | 0.76 (0.22)            | 1.60 (0.25)           | 6/24                   | 1.12               | 1.33                                  | 52084             |
| Fulda et al., 2010      | Germany        | 0.73 (0.19)            |                       | 9/14                   | 0.29               | 1.23                                  | 41733             |
| Gale et al., 2008       | UK             | 0.33 (0.02)            |                       | 130/111                | 0.63               | 0.98                                  | 48428             |
| Gale et al., 2007       | USA            | 0.74 (0.03)            | 0.18 (0.03)           | 59/113                 | 0.85               | 1.21                                  | 46437             |
| Galea & Kimura, 1993    | Canada         | 0.34 (0.13)            | -0.54 (0.06)          | 49/48                  | 0.58               | 0.77                                  | 20771             |
| Gallagher & Burke, 2007 | Ireland        |                        | -0.86 (0.04)          | 60/57                  | 0.85               | 0.78                                  | 54286             |
| Gallagher et al., 2006  | UK             |                        | -0.04 (0.02)          | 60/60                  | 0.57               | 0.87                                  | 40048             |
| Ganguli et al., 2009    | USA            | 0.11 (0.00)            | 0.00 (0.00)           | 748/1180               | 0.89               | 1.21                                  | 48401             |
| Gavazzeni et al., 2012  | Sweden         | -0.03 (0.06)           |                       | 34/38                  | 1.30               | 1.34                                  | 59594             |
| Gedney & Logan, 2004    | USA            |                        | -0.11 (0.06)          | 37/30                  | 0.78               | 1.21                                  | 39677             |
| Geer & McGlone, 1990    | USA            | 0.01 (0.12)            |                       | 20/20                  | 0.82               | 1.14                                  | 22922             |
| Gerstorff et al., 2006  | Germany        | 0.14 (0.01)            |                       | 258/258                | 0.19               | 0.96                                  | 34697             |
| Gibbs & Wilson, 1999    | USA            |                        | -0.74 (0.09)          | 17/15                  | 0.65               | 1.30                                  | 32949             |
| Glaser et al., 2012     | Canada         | -0.02 (0.12)           |                       | 17/17                  | 1.12               | 1.33                                  | 52084             |
| Göder et al., 2004      | Germany        |                        | 0.68 (0.26)           | 10/7                   | -0.09              | 0.76                                  | 30360             |
| Gogos et al., 2010      | Australia      | 0.23 (0.09)            | -0.56 (0.10)          | 21/22                  | 0.97               | 1.08                                  | 42715             |
| Goldstein et al., 1998  | USA            | 0.24 (0.15)            | 0.08 (0.15)           | 13/14                  | 0.66               | 1.29                                  | 31573             |
| Golier et al., 2005     | USA            | 0.26 (0.22)            |                       | 13/7                   | 0.81               | 1.19                                  | 41922             |
| Gonzales et al., 2012   | USA            | 0.92 (0.08)            | -0.14 (0.08)          | 24/30                  | 0.92               | 1.08                                  | 49782             |
| González et al., 2001   | USA            | 0.26 (0.01)            |                       | 331/470                | 0.65               | 1.30                                  | 36450             |
| Gow et al., 2013        | UK             | 0.26 (0.00)            |                       | 544/543                | 0.80               | 1.15                                  | 41295             |
| Grabe & Kamhawi, 2006   | USA            |                        | 0.28 (0.06)           | 36/39                  | 0.85               | 1.19                                  | 44308             |



| Study                   | Country     | d Verbal<br>(variance) | d Other<br>(variance) | N<br>Males/<br>Females | Gender<br>Equality | Population<br>Education<br>Employment | GDP per<br>Capita |
|-------------------------|-------------|------------------------|-----------------------|------------------------|--------------------|---------------------------------------|-------------------|
| Grabe & Samson, 2011    | USA         |                        | 0.14 (0.01)           | 193/193                | 0.93               | 1.12                                  | 48374             |
| Grahn et al., 2013      | Sweden      | 0.21 (0.14)            |                       | 15/13                  | 1.33               | 1.36                                  | 57134             |
| Grambaite et al., 2014  | Norway      | 0.73 (0.19)            |                       | 11/12                  | 1.23               | 1.20                                  | 102910            |
| Gruzelier et al., 1999  | UK          | 0.10 (0.04)            | -0.58 (0.04)          | 45/50                  | 0.76               | 0.57                                  | 26281             |
| Guillem & Mograss, 2005 | Canada      |                        | 1.03 (0.18)           | 16/10                  | 0.93               | 1.25                                  | 31980             |
| Guillem et al., 2009    | Canada      |                        | 0.52 (0.23)           | 9/9                    | 1.05               | 1.35                                  | 46596             |
| Gummerum et al., 2013   | UK          | -0.25 (0.05)           |                       | 19/19                  | 0.80               | 1.15                                  | 41295             |
| Gupta & Kaur, 1996      | India       | 0.06 (0.05)            |                       | 20/20                  | -2.40              | -1.38                                 | 382               |
| Gur et al., 2012        | USA         | 0.13 (0.00)            | 0.06 (0.00)           | 1597/1851              | 0.92               | 1.08                                  | 49782             |
| Haan et al., 2003       | USA         | 0.55 (0.00)            |                       | 585/823                | 0.73               | 1.25                                  | 38166             |
| Haász et al., 2013      | Norway      | 1.03 (0.05)            |                       | 33/67                  | 1.21               | 1.21                                  | 101564            |
| Hagsand et al., 2013    | Sweden      |                        | 0.12 (0.11)           | 13/29                  | 1.33               | 1.36                                  | 57134             |
| Hall & Mast, 2008       | Switzerland | 0.69 (0.02)            | 0.03 (0.04)           | 170/172                | 0.14               | 1.47                                  | 63223             |
| Halpern, 1985           | USA         | -0.09 (0.02)           |                       | 39/49                  | 0.66               | 1.10                                  | 17134             |
| Halpern et al., 2011    | USA         | 0.25 (0.08)            | 0.04 (0.07)           | 38/21                  | 0.93               | 1.12                                  | 48374             |
| Han et al., 2012        | China       |                        | 0.29 (0.01)           | 141/130                | 0.25               | 0.32                                  | 5574              |
| Hannay & Rogers, 1979;  | USA         |                        | 0.06 (0.08)           | 24/24                  | 0.45               | 1.03                                  | 10587             |
| Harness et al., 2008    | USA         | 0.17 (0.03)            |                       | 54/54                  | 0.86               | 1.20                                  | 48062             |
| Harrington et al., 2013 | USA         | 0.25 (0.06)            | 0.37 (0.07)           | 26/42                  | 0.91               | 1.08                                  | 51433             |
| Hassan & Rahman, 2007   | UK          |                        | 0.55 (0.08)           | 40/20                  | 0.61               | 0.94                                  | 42534             |
| Hassmén et al., 2002    | Sweden      | -0.40 (0.05)           |                       | 28/26                  | 1.27               | 1.16                                  | 26969             |
| Haut & Barch, 2006      | USA         | -0.14 (0.04)           | -0.20 (0.04)          | 47/63                  | 0.85               | 1.19                                  | 44308             |
| Hayden et al., 2005     | USA         | -0.12 (0.01)           | -0.22 (0.01)          | 203/282                | 0.81               | 1.19                                  | 41922             |
| Hazlett et al., 2010    | USA         | 0.34 (0.06)            |                       | 35/35                  | 0.92               | 1.17                                  | 47002             |
| Heisz et al., 2013      | Canada      |                        | 0.67 (0.05)           | 40/40                  | 1.11               | 1.33                                  | 52495             |
| Heller et al., 2010     | USA         |                        | 0.46 (0.04)           | 30/30                  | 0.92               | 1.17                                  | 47002             |
| Hellström et al., 2008  | Sweden      | 0.26 (0.03)            |                       | 108/51                 | 1.46               | 1.33                                  | 53324             |
| Hellvin et al., 2012    | Norway      | 0.60 (0.04)            | 0.00 (0.04)           | 49/61                  | 1.22               | 1.18                                  | 100575            |
| Herlitz et al., 1997    | Sweden      | 0.28 (0.00)            | 0.21 (0.00)           | 470/530                | 1.10               | 1.13                                  | 32587             |
| Herlitz & Kabir, 2006   | Bangladesh  | 0.10 (0.01)            |                       | 194/232                | -0.42              | -1.50                                 | 486               |
| Herlitz & Yonker, 2002  | Sweden      |                        | 0.37 (0.02)           | 88/99                  | 1.27               | 1.16                                  | 26969             |

| Study                   | Country     | d Verbal<br>(variance) | d Other<br>(variance) | N<br>Males/<br>Females | Gender<br>Equality | Population<br>Education<br>Employment | GDP per<br>Capita |
|-------------------------|-------------|------------------------|-----------------------|------------------------|--------------------|---------------------------------------|-------------------|
| Herlitz et al., 1999    | Sweden      | 0.24 (0.02)            | -0.06 (0.02)          | 100/100                | 1.09               | 1.11                                  | 30144             |
| Herlitz et al., 2013    | Sweden      | 0.39 (0.02)            | 0.45 (0.02)           | 85/102                 | 1.33               | 1.36                                  | 57134             |
| Herold et al., 2013     | Germany     | 0.18 (0.20)            |                       | 12/9                   | 0.35               | 1.32                                  | 44011             |
| Herrmann et al., 1992   | UK          |                        | 1.02 (0.14)           | 16/16                  | 0.51               | 0.55                                  | 19901             |
| Herzmann et al., 2012   | USA         |                        | -0.13 (0.16)          | 13/13                  | 0.92               | 1.08                                  | 49782             |
| Hirata et al., 2009     | Brazil      | 0.25 (0.00)            |                       | 333/871                | 0.71               | -0.06                                 | 8707              |
| Hogervorst et al., 2004 | UK          | 0.25 (0.03)            | -0.11 (0.03)          | 79/66                  | 0.68               | 0.76                                  | 32575             |
| Holsen et al., 2008     | USA         |                        | 0.69 (0.39)           | 5/6                    | 0.86               | 1.20                                  | 48062             |
| Honda & Nihei, 2009     | Japan       |                        | 0.34 (0.05)           | 40/44                  | 0.12               | 0.83                                  | 37866             |
| Horgan et al., 2004     | USA         |                        | 0.30 (0.02)           | 82/106                 | 0.78               | 1.21                                  | 39677             |
| Horgan et al., 2009     | USA         | -0.06 (0.04)           | 0.37 (0.04)           | 44/64                  | 0.89               | 1.21                                  | 48401             |
| Horgan et al., 2012     | USA         | 0.41 (0.03)            |                       | 60/64                  | 0.92               | 1.08                                  | 49782             |
| Hota, 1983              | India       | 0.15 (0.07)            |                       | 32/28                  | -1.79              | -1.64                                 | 280               |
| Huang et al., 2008      | Taiwan      |                        | -0.75 (0.09)          | 21/27                  |                    |                                       |                   |
| Hubley, 2010            | Canada      |                        | 0.07 (0.08)           | 16/48                  | 1.09               | 1.33                                  | 40773             |
| Huestegge et al., 2012  | UK          |                        | -0.17 (0.11)          | 18/18                  | 0.80               | 1.11                                  | 41020             |
| Hynd & Obrzut, 1978     | USA         | 0.29 (0.10)            |                       | 20/20                  | 0.46               | 1.01                                  | 9471              |
| Hyttinena et al., 2010  | Finland     | 0.33 (0.01)            |                       | 112/197                | 1.16               | 0.67                                  | 47107             |
| Iachini et al., 2008    | Italy       |                        | -0.49 (0.12)          | 8/9                    | -0.24              | -0.35                                 | 37699             |
| Iachini et al., 2005    | Italy       |                        | -0.14 (0.03)          | 64/64                  | -0.32              | -0.36                                 | 31175             |
| Iachini et al., 2009    | Italy       |                        | -0.40 (0.03)          | 70/70                  | -0.18              | -0.30                                 | 40640             |
| Ionescu, 2000           | USA         | -0.09 (0.11)           |                       | 17/20                  | 0.66               | 1.30                                  | 34621             |
| Ionescu, 2002           | USA         | -0.01 (0.02)           |                       | 95/112                 | 0.69               | 1.27                                  | 37274             |
| Ionescu, 2004           | USA         | -0.16 (0.09)           |                       | 23/23                  | 0.78               | 1.21                                  | 39677             |
| Iqbal et al., 2009      | UK          | 0.29 (0.17)            | -0.30 (0.17)          | 13/11                  | 0.68               | 1.04                                  | 45195             |
| Iverson et al., 2014    | Canada      | 0.24 (0.04)            | -0.05 (0.04)          | 50/50                  | 1.12               | 1.34                                  | 52266             |
| James & Kimura, 1997    | Canada      |                        | 0.32 (0.02)           | 67/66                  | 0.63               | 0.77                                  | 21183             |
| Janowski et al., 2012   | Poland      | -0.10 (0.07)           | -0.55 (0.08)          | 20/44                  | 0.51               | 0.31                                  | 13891             |
| Jehna et al., 2011      | Austria     | 0.98 (0.36)            |                       | 5/8                    | -0.33              | 0.61                                  | 46660             |
| Jhoo et al., 2010       | South Korea | -0.18 (0.28)           |                       | 12/5                   | -0.55              | 0.30                                  | 18339             |
| Jiang et al., 2010      | USA         | 0.43 (0.21)            | 0.87 (0.22)           | 8/13                   | 0.92               | 1.17                                  | 47002             |

| Study                    | Country      | d Verbal<br>(variance) | d Other<br>(variance) | N<br>Males/<br>Females | Gender<br>Equality | Population<br>Education<br>Employment | GDP per<br>Capita |
|--------------------------|--------------|------------------------|-----------------------|------------------------|--------------------|---------------------------------------|-------------------|
| Jones et al., 1996       | USA          | -0.05 (0.06)           |                       | 36/36                  | 0.64               | 1.24                                  | 28782             |
| Karadayi et al., 2014    | Turkey       | 0.03 (0.15)            |                       | 10/20                  | -1.69              | -1.42                                 | 10800             |
| Kargopoulos et al., 2003 | Greece       |                        | 1.04 (0.14)           | 16/16                  | -0.48              | -0.21                                 | 14110             |
| Kashyap et al., 2013     | India        | 0.00 (0.08)            | -0.16 (0.05)          | 81/30                  | -3.04              | -1.47                                 | 1444              |
| Kawano et al., 2013      | Japan        | 0.00 (0.08)            |                       | 23/27                  | 0.19               | 0.89                                  | 46701             |
| Kayser et al., 2007      | USA          | 0.43 (0.10)            |                       | 19/21                  | 0.85               | 1.21                                  | 46437             |
| Keefe et al., 2009       | USA          | 0.61 (0.01)            |                       | 170/184                | 0.89               | 1.21                                  | 48401             |
| Keith et al., 2009       | USA          | -0.01 (0.00)           | 0.05 (0.00)           | 9544/10630             | 0.89               | 1.21                                  | 48401             |
| Keith et al., 2011       | USA          |                        | 0.16 (0.00)           | 1300/1300              | 0.93               | 1.12                                  | 48374             |
| Kelley et al., 2005      | USA          | -0.40 (0.36)           | -0.22 (0.34)          | 5/7                    | 0.81               | 1.19                                  | 41922             |
| Kennet et al., 2000      | USA          | 0.46 (0.00)            |                       | 724/868                | 0.66               | 1.30                                  | 34621             |
| Kersker et al., 2003     | USA          |                        | 0.19 (0.08)           | 17/16                  | 0.73               | 1.25                                  | 38166             |
| Kessels et al., 2006     | Netherlands  | 0.11 (0.03)            | 0.09 (0.03)           | 61/100                 | 0.34               | 0.98                                  | 41577             |
| Kim & Hamann, 2011       | South Korea  | 0.21 (0.13)            |                       | 17/15                  | -0.52              | 0.35                                  | 22151             |
| Kim & Kang, 1999         | South Korea  | 0.59 (0.01)            |                       | 181/176                | -1.07              | -0.04                                 | 8134              |
| Kim et al., 2012         | South Korea  | 0.18 (0.01)            | -0.22 (0.01)          | 290/485                | -0.51              | 0.37                                  | 24156             |
| Kim et al., 2013         | South Korea  | -0.05 (0.02)           | -0.38 (0.02)          | 101/129                | -0.50              | 0.39                                  | 24454             |
| Kimura & Clarke, 2002    | USA          | 0.47 (0.05)            |                       | 41/44                  | 0.69               | 1.27                                  | 37274             |
| Kimura & Seal, 2003      | Canada       | 0.57 (0.08)            |                       | 25/28                  | 0.85               | 1.10                                  | 24168             |
| Kisser et al., 2012      | USA          | 0.01 (0.06)            | 0.13 (0.15)           | 21/94                  | 0.92               | 1.08                                  | 49782             |
| Koenig et al., 2013      | USA          | -0.18 (0.23)           | -0.45 (0.22)          | 7/13                   | 0.91               | 1.08                                  | 51433             |
| Koerts et al., 2013      | Netherlands  | 1.07 (0.07)            |                       | 32/33                  | 0.53               | 1.23                                  | 49475             |
| Komulainen et al., 2008  | Finland      | 0.35 (0.00)            |                       | 684/705                | 1.12               | 0.69                                  | 48289             |
| Kormi-Nouri et al., 2003 | Sweden       |                        | 0.39 (0.03)           | 60/60                  | 1.34               | 1.17                                  | 29572             |
| Kovac & Majerova, 1974   | Slovakia     |                        | -0.31 (0.01)          | 123/102                | -0.11              | 0.69                                  | 2396              |
| Kowal et al., 2012       | China        | -0.07 (0.00)           |                       | 5895/6751              | 0.25               | 0.33                                  | 4515              |
| Kowal et al., 2012       | Ghana        | -0.22 (0.00)           |                       | 2227/2039              | -0.03              | 0.23                                  | 1323              |
| Kowal et al., 2012       | India        | -0.21 (0.00)           |                       | 3262/3205              | -2.98              | -1.38                                 | 1388              |
| Kowal et al., 2012       | Mexico       | 0.18 (0.00)            |                       | 848/1330               | -0.39              | -0.36                                 | 8861              |
| Kowal et al., 2012       | Russia       | 0.05 (0.00)            |                       | 1351/2468              | 0.66               | 0.83                                  | 10675             |
| Kowal et al., 2012       | South Africa | -0.09 (0.00)           |                       | 1555/2105              | 0.36               | -0.77                                 | 7393              |

| Study                         | Country     | d Verbal<br>(variance) | d Other<br>(variance) | N<br>Males/<br>Females | Gender<br>Equality | Population<br>Education<br>Employment | GDP per<br>Capita |
|-------------------------------|-------------|------------------------|-----------------------|------------------------|--------------------|---------------------------------------|-------------------|
| Kramer et al., 1997           | USA         | 0.30 (0.01)            |                       | 401/372                | 0.65               | 1.26                                  | 30068             |
| Kramer et al., 2003           | USA         | 0.49 (0.00)            |                       | 489/530                | 0.73               | 1.25                                  | 38166             |
| Kremen et al., 1997           | USA         | 0.12 (0.06)            | 0.43 (0.06)           | 28/44                  | 0.65               | 1.26                                  | 30068             |
| Krohne & Hock, 2008           | Germany     |                        | 0.35 (0.04)           | 50/47                  | 0.26               | 1.13                                  | 41815             |
| Kromann et al., 2011          | Denmark     |                        | -0.14 (0.03)          | 24/42                  | 0.83               | 1.24                                  | 57648             |
| Kroneisen & Bell, 2013        | Germany     |                        | -0.02 (0.06)          | 19/103                 | 0.35               | 1.32                                  | 44011             |
| Kuriyama et al., 2011         | Japan       |                        | -0.08 (0.17)          | 7/8                    | 0.22               | 0.89                                  | 42935             |
| Lachman & Agrigoroaei, 2010   | USA         | 0.44 (0.03)            |                       | 81/68                  | 0.92               | 1.17                                  | 47002             |
| Lachman et al., 2014          | USA         | 0.43 (0.00)            |                       | 1921/2326              | 0.90               | 1.06                                  | 52660             |
| Laing et al., 2011            | Australia   | 0.44 (0.01)            |                       | 192/173                | 1.00               | 1.09                                  | 51846             |
| Lajiness-O'Neill et al., 2011 | USA         | 0.47 (0.07)            | 0.14 (0.07)           | 24/41                  | 0.93               | 1.12                                  | 48374             |
| Lam et al., 2008              | USA         | 0.51 (0.00)            | -0.24 (0.00)          | 602/849                | 0.86               | 1.20                                  | 48062             |
| Lanca, 1998                   | Canada      |                        | -0.41 (0.05)          | 30/30                  | 0.66               | 0.80                                  | 21770             |
| Larrabee & Crook, 1993        | USA         | 0.51 (0.00)            | 0.54 (0.00)           | 417/417                | 0.74               | 1.17                                  | 25493             |
| Larson et al., 2003           | Sweden      |                        | 0.54 (0.06)           | 33/35                  | 1.34               | 1.17                                  | 29572             |
| Larsson et al., 2009          | Sweden      |                        | 0.29 (0.02)           | 98/104                 | 1.41               | 1.33                                  | 55747             |
| Latvala et al., 2009          | Finland     | 0.61 (0.01)            |                       | 157/248                | 1.09               | 0.73                                  | 53401             |
| Laukka et al., 2013           | Sweden      | 0.16 (0.00)            |                       | 1011/1637              | 1.33               | 1.36                                  | 57134             |
| Laureati et al., 2008         | Netherlands |                        | 0.41 (0.03)           | 37/48                  | 0.41               | 1.14                                  | 51241             |
| Lauvsnes et al., 2013         | Norway      | -0.20 (0.16)           | -0.18 (0.16)          | 8/33                   | 1.21               | 1.21                                  | 101564            |
| Lavoie et al., 2007           | Canada      | 0.60 (0.19)            | -0.29 (0.19)          | 10/12                  | 1.00               | 1.27                                  | 40387             |
| Lawrence et al., 2008         | UK          |                        | 0.04 (0.01)           | 223/215                | 0.63               | 0.98                                  | 48428             |
| Lee et al., 2002              | China       | 0.22 (0.02)            | 0.14 (0.02)           | 125/138                | -0.03              | 0.60                                  | 1047              |
| Lee et al., 2007              | USA         | 0.41 (0.00)            | -0.31 (0.00)          | 388/744                | 0.85               | 1.21                                  | 46437             |
| Lee et al., 2012              | Australia   | 0.66 (0.01)            | -0.10 (0.01)          | 136/283                | 1.01               | 1.10                                  | 62217             |
| Lehmann et al., 2006          | UK          | 0.52 (0.00)            |                       | 895/1087               | 0.57               | 0.87                                  | 40048             |
| Lehrner, 1993                 | USA         |                        | 0.69 (0.08)           | 27/29                  | 0.74               | 1.17                                  | 25493             |
| Lejbak et al., 2008           | Canada      |                        | 0.53 (0.10)           | 20/20                  | 1.04               | 1.33                                  | 44545             |
| Lester & Miller, 1974         | USA         | 0.68 (0.11)            |                       | 20/20                  | 0.52               | 0.92                                  | 6741              |
| Levy et al., 2005             | USA         |                        | 0.30 (0.08)           | 31/24                  | 0.81               | 1.19                                  | 41922             |
| Lewin & Herlitz, 2002         | Sweden      |                        | 0.36 (0.02)           | 93/99                  | 1.27               | 1.16                                  | 26969             |

| Study                          | Country     | d Verbal<br>(variance) | d Other<br>(variance) | N<br>Males/<br>Females | Gender<br>Equality | Population<br>Education<br>Employment | GDP per<br>Capita |
|--------------------------------|-------------|------------------------|-----------------------|------------------------|--------------------|---------------------------------------|-------------------|
| Lewin et al., 2001             | Sweden      | 0.15 (0.02)            | -0.03 (0.02)          | 91/94                  | 1.15               | 1.11                                  | 29283             |
| Leynes et al., 2013            | USA         | -0.29 (0.16)           |                       | 9/22                   | 0.91               | 1.08                                  | 51433             |
| Liben & Signorella, 1980       | USA         | 0.00 (0.14)            |                       | 16/15                  | 0.43               | 1.05                                  | 11696             |
| Liben & Signorella, 1993       | USA         | 0.25 (0.02)            |                       | 115/134                | 0.74               | 1.17                                  | 25493             |
| Lin et al., 2008               | Taiwan      | 0.23 (0.03)            |                       | 79/72                  |                    |                                       |                   |
| Lin et al., 2010               | Australia   | -0.16 (0.05)           | 0.50 (0.06)           | 37/38                  | 0.97               | 1.08                                  | 42715             |
| Lindholm & Christianson, 1998  | Sweden      |                        | 0.38 (0.02)           | 80/84                  | 1.10               | 1.12                                  | 29898             |
| Lindquist et al., 2009         | Sweden      | 1.80 (0.74)            | 0.31 (0.54)           | 5/3                    | 1.41               | 1.33                                  | 55747             |
| Ling et al., 2013              | USA         | 0.56 (0.09)            |                       | 25/24                  | 0.91               | 1.08                                  | 51433             |
| Lipton et al., 2010            | USA         | 0.18 (0.01)            |                       | 154/270                | 0.92               | 1.17                                  | 47002             |
| Lobnig et al., 2005            | Germany     | -0.08 (0.36)           |                       | 9/4                    | 0.06               | 0.81                                  | 34166             |
| Loebach Wetherell et al., 2002 | Sweden      | 0.25 (0.01)            | 0.21 (0.01)           | 288/416                | 1.27               | 1.16                                  | 26969             |
| Lombardo et al., 2007          | UK          | 0.59 (0.20)            |                       | 23/7                   | 0.61               | 0.94                                  | 42534             |
| Lorenzi-Cioldi, 1993           | Switzerland | 0.28 (0.03)            |                       | 65/80                  | -0.37              | 1.07                                  | 39436             |
| Loskutova et al., 2009         | USA         | 0.15 (0.05)            |                       | 36/48                  | 0.89               | 1.21                                  | 48401             |
| Lövdén et al., 2007            | Germany     | 0.00 (0.12)            | -0.90 (0.14)          | 16/16                  | 0.23               | 1.05                                  | 36448             |
| Lovén et al., 2012             | Sweden      |                        | 0.12 (0.08)           | 24/28                  | 1.30               | 1.34                                  | 59594             |
| Lucas et al., 2005             | USA         | 0.04 (0.02)            | 0.20 (0.02)           | 71/237                 | 0.81               | 1.19                                  | 41922             |
| Lui et al., 2011               | China       | 0.32 (0.12)            | -0.43 (0.12)          | 15/20                  | 0.25               | 0.33                                  | 4515              |
| Lunzer et al., 1976            | UK          | -0.03 (0.02)           |                       | 105/105                | 0.33               | 0.39                                  | 4300              |
| Luszcz, 1992                   | Australia   | 0.37 (0.04)            |                       | 52/54                  | 0.25               | 0.76                                  | 18837             |
| Luzzi et al., 2011             | Italy       |                        | -0.30 (0.01)          | 168/178                | -0.11              | -0.31                                 | 35852             |
| Lynn & Wilson, 1993            | Ireland     | 0.36 (0.00)            |                       | 605/594                | -0.08              | -0.38                                 | 15732             |
| Maass et al., 2011             | Germany     | 0.54 (0.02)            | -0.34 (0.02)          | 94/83                  | 0.31               | 1.28                                  | 41788             |
| Maggi et al., 2008             | Italy       | -0.21 (0.00)           |                       | 1186/1452              | -0.24              | -0.35                                 | 37699             |
| Maheu et al., 2008             | USA         | -0.27 (0.25)           |                       | 10/7                   | 0.86               | 1.20                                  | 48062             |
| Malaspina et al., 2012         | USA         |                        | -0.21 (0.15)          | 13/14                  | 0.92               | 1.08                                  | 49782             |
| Malek-Ahmadi et al., 2011      | USA         | 0.73 (0.02)            |                       | 82/101                 | 0.93               | 1.12                                  | 48374             |
| Malloy-Diniz et al., 2007      | Brazil      | 0.35 (0.02)            |                       | 111/112                | 0.67               | -0.13                                 | 5808              |
| Marchant et al., 2010          | UK          | 0.48 (0.15)            |                       | 15/12                  | 0.74               | 1.08                                  | 37166             |
| Marquié et al., 2010           | France      | 0.37 (0.00)            |                       | 1644/1554              | 0.54               | 0.44                                  | 41631             |

| Study                         | Country     | d Verbal<br>(variance) | d Other<br>(variance) | N<br>Males/<br>Females | Gender<br>Equality | Population<br>Education<br>Employment | GDP per<br>Capita |
|-------------------------------|-------------|------------------------|-----------------------|------------------------|--------------------|---------------------------------------|-------------------|
| Marsland et al., 2006         | USA         | 0.31 (0.01)            | 0.48 (0.01)           | 237/223                | 0.85               | 1.19                                  | 44308             |
| Martin et al., 2012           | Australia   | 0.59 (0.01)            | -0.37 (0.01)          | 241/187                | 1.01               | 1.10                                  | 62217             |
| Martins et al., 2005          | Portugal    | 0.13 (0.01)            | -0.21 (0.01)          | 275/228                | 0.43               | -0.11                                 | 18046             |
| Martins et al., 2012          | Portugal    | 0.29 (0.01)            | -0.14 (0.01)          | 172/307                | 0.71               | 0.05                                  | 23195             |
| Maruff et al., 2004           | Australia   | 0.21 (0.14)            |                       | 25/10                  | 0.68               | 0.90                                  | 23440             |
| Marx et al., 2009             | USA         | 0.14 (0.02)            | 0.06 (0.02)           | 613/55                 | 0.89               | 1.21                                  | 48401             |
| Maseda et al., 2013           | Spain       | 0.17 (0.19)            |                       | 4/27                   | 0.60               | 0.68                                  | 28648             |
| Mast & Hall, 2006             | USA         |                        | 0.53 (0.01)           | 188/233                | 0.85               | 1.19                                  | 44308             |
| Mataix-Cols et al., 2006      | Spain       | 0.91 (0.11)            |                       | 20/20                  | -0.09              | 0.36                                  | 26511             |
| Mathias et al., 2013          | Australia   | 0.51 (0.06)            | 0.21 (0.06)           | 34/37                  | 1.02               | 1.09                                  | 67646             |
| Matsuoka et al., 2012         | Japan       | -0.11 (0.20)           |                       | 17/7                   | 0.18               | 0.88                                  | 46230             |
| May & Hutt, 1974              | Canada      | 0.66 (0.07)            |                       | 30/30                  | 0.50               | 0.60                                  | 5871              |
| McBurney et al., 1997         | USA         |                        | 0.82 (0.04)           | 57/46                  | 0.65               | 1.26                                  | 30068             |
| McCall et al., 2007           | USA         | 0.02 (0.05)            |                       | 31/46                  | 0.85               | 1.21                                  | 46437             |
| McFarlane et al., 2002        | Australia   |                        | -0.03 (0.02)          | 51/46                  | 0.60               | 0.85                                  | 19495             |
| McGivern et al., 1997         | USA         | 0.43 (0.01)            | 0.43 (0.01)           | 191/203                | 0.65               | 1.26                                  | 30068             |
| McGivern et al., 1998         | USA         |                        | 0.73 (0.07)           | 30/33                  | 0.66               | 1.29                                  | 31573             |
| McGugin et al., 2012          | USA         |                        | 0.21 (0.02)           | 102/121                | 0.92               | 1.08                                  | 49782             |
| McGuinness et al., 1990       | USA         | 0.55 (0.05)            | 0.69 (0.02)           | 85/94                  | 0.82               | 1.14                                  | 22922             |
| McGuinness & McLaughlin, 1982 | USA         |                        | 0.83 (0.06)           | 40/40                  | 0.48               | 1.08                                  | 13993             |
| McKelvie, 1987                | Canada      |                        | 0.13 (0.06)           | 41/64                  | 0.43               | 0.77                                  | 14404             |
| McKelvie et al., 1993         | Canada      |                        | -0.71 (0.09)          | 15/15                  | 0.58               | 0.77                                  | 20771             |
| McMains et al., 1993          | USA         |                        | 0.25 (0.09)           | 33/16                  | 0.74               | 1.17                                  | 25493             |
| McWilliams et al., 2014       | USA         | 0.15 (0.04)            |                       | 38/68                  | 0.90               | 1.06                                  | 52660             |
| Mecklinger et al., 2011       | Germany     | -0.12 (0.11)           |                       | 19/19                  | 0.31               | 1.28                                  | 41788             |
| Meekes et al., 2013           | Netherlands | 0.06 (0.10)            |                       | 16/26                  | 0.53               | 1.23                                  | 49475             |
| Mehta et al., 2013            | India       | 0.07 (0.08)            | -0.04 (0.08)          | 42/18                  | -3.04              | -1.47                                 | 1444              |
| Meier, 1991                   | USA         | 0.26 (0.04)            |                       | 36/93                  | 0.84               | 1.14                                  | 23954             |
| Meier et al., 2002            | Switzerland | 0.43 (0.01)            |                       | 198/89                 | -0.18              | 1.16                                  | 38539             |
| Meijer et al., 2011           | Netherlands | 0.54 (0.01)            |                       | 267/320                | 0.49               | 1.18                                  | 50341             |
| Meléndes-Moral et al., 2010   | Spain       |                        | -0.04 (0.03)          | 19/41                  | 0.40               | 0.60                                  | 32333             |

| Study                          | Country     | d Verbal<br>(variance) | d Other<br>(variance) | N<br>Males/<br>Females | Gender<br>Equality | Population<br>Education<br>Employment | GDP per<br>Capita |
|--------------------------------|-------------|------------------------|-----------------------|------------------------|--------------------|---------------------------------------|-------------------|
| Mellet et al., 2014            | France      | 0.47 (0.01)            |                       | 213/220                | 0.60               | 0.52                                  | 42571             |
| Merema et al., 2013            | USA         | 0.31 (0.03)            | 0.09 (0.02)           | 62/115                 | 0.91               | 1.08                                  | 51433             |
| Meyers-Levy & Maheswaran, 1991 | USA         | 0.43 (0.05)            |                       | 45/45                  | 0.84               | 1.14                                  | 23954             |
| Mielke et al., 2012            | USA         | 0.51 (0.01)            | 0.07 (0.01)           | 265/218                | 0.92               | 1.08                                  | 49782             |
| Miller & Santoni, 1986         | USA         |                        | -0.67 (0.05)          | 23/23                  | 0.72               | 1.11                                  | 18269             |
| Minnett et al., 2005           | UK          | -0.03 (0.07)           | -0.75 (0.08)          | 23/37                  | 0.63               | 0.80                                  | 38306             |
| Mizuno et al., 2011            | Japan       | -0.10 (0.03)           |                       | 55/63                  | 0.22               | 0.89                                  | 42935             |
| Moffat et al., 1998            | USA         |                        | -1.59 (0.07)          | 40/34                  | 0.66               | 1.29                                  | 31573             |
| Mokri et al., 2013             | Mexico      | 0.25 (0.03)            |                       | 149/161                | -0.32              | -0.30                                 | 9721              |
| Morales et al., 2010           | Spain       | -0.03 (0.01)           |                       | 359/525                | 0.40               | 0.60                                  | 32333             |
| Morgan et al., 2006            | USA         | 0.10 (0.04)            |                       | 63/45                  | 0.85               | 1.19                                  | 44308             |
| Morrens et al., 2008           | Belgium     | -0.08 (0.22)           |                       | 20/6                   | 0.42               | 0.26                                  | 44404             |
| Mueller et al., 2008           | UK          |                        | -1.34 (0.20)          | 12/12                  | 0.63               | 0.98                                  | 48428             |
| Müller et al., 2007            | Germany     | 0.49 (0.16)            | 0.06 (0.16)           | 17/10                  | 0.23               | 1.05                                  | 36448             |
| Munro et al., 2012             | USA         | 0.27 (0.00)            |                       | 477/480                | 0.92               | 1.08                                  | 49782             |
| Murre et al., 2013             | Netherlands | 0.12 (0.00)            | 0.30 (0.00)           | 4109/8350              | 0.53               | 1.23                                  | 49475             |
| Nairne et al., 2009            | USA         | 0.26 (0.03)            |                       | 75/75                  | 0.89               | 1.21                                  | 48401             |
| Närhi et al., 2010             | Finland     | 0.74 (0.10)            |                       | 17/31                  | 1.16               | 0.67                                  | 47107             |
| Naveh-Benjamin et al., 2011    | USA         | 0.38 (0.03)            |                       | 61/70                  | 0.93               | 1.12                                  | 48374             |
| Newhouse et al., 2007          | USA         |                        | -0.54 (0.10)          | 20/20                  | 0.85               | 1.21                                  | 46437             |
| Ngandu et al., 2006            | Finland     | 0.22 (0.00)            |                       | 365/627                | 1.10               | 0.60                                  | 38969             |
| Nieto et al., 2012             | Spain       | 0.49 (0.13)            | -0.11 (0.13)          | 17/14                  | 0.56               | 0.66                                  | 31832             |
| Nobili et al., 2010            | Italy       | 0.41 (0.18)            |                       | 8/21                   | -0.15              | -0.32                                 | 36977             |
| Novotny et al., 2003           | USA         | 0.25 (0.04)            |                       | 46/52                  | 0.73               | 1.25                                  | 38166             |
| O'Hara et al., 2006            | USA         | 0.22 (0.03)            |                       | 44/79                  | 0.85               | 1.19                                  | 44308             |
| O'Sullivan, 1997               | Canada      | 0.53 (0.14)            |                       | 13/17                  | 0.63               | 0.77                                  | 21183             |
| Öberg et al., 2002             | Sweden      |                        | 0.36 (0.06)           | 36/35                  | 1.27               | 1.16                                  | 26969             |
| Kristensen & Oerbeck, 2006     | Norway      |                        | -0.03 (0.07)          | 26/36                  | 1.07               | 1.25                                  | 66775             |
| Ojeda et al., 2010             | Spain       | 0.66 (0.11)            |                       | 34/13                  | 0.40               | 0.60                                  | 32333             |
| Østby et al., 2012             | Norway      |                        | 0.50 (0.04)           | 55/52                  | 1.22               | 1.18                                  | 100575            |
| Otero Dadin et al., 2009       | Spain       | 0.52 (0.11)            | 0.22 (0.11)           | 20/19                  | 0.25               | 0.56                                  | 35579             |

| Study                        | Country      | d Verbal<br>(variance) | d Other<br>(variance) | N<br>Males/<br>Females | Gender<br>Equality | Population<br>Education<br>Employment | GDP per<br>Capita |
|------------------------------|--------------|------------------------|-----------------------|------------------------|--------------------|---------------------------------------|-------------------|
| Ott & Lyman, 1993            | USA          | -0.01 (0.14)           | 0.56 (0.14)           | 18/12                  | 0.74               | 1.17                                  | 25493             |
| Owen & Lynn, 1993            | South Africa | 0.24 (0.00)            | 0.13 (0.00)           | 1574/1637              | 0.06               | -1.15                                 | 3557              |
| Palmer et al., 2013          | Australia    |                        | 0.03 (0.01)           | 45/68                  | 1.02               | 1.09                                  | 67646             |
| Palomo et al., 2013          | Spain        | 0.02 (0.02)            | -0.14 (0.02)          | 65/114                 | 0.60               | 0.68                                  | 28648             |
| Parada et al., 2011          | Spain        | 0.64 (0.03)            |                       | 31/29                  | 0.50               | 0.63                                  | 30738             |
| Parks et al., 2011           | USA          | 0.60 (0.02)            |                       | 70/147                 | 0.93               | 1.12                                  | 48374             |
| Passamonti et al., 2011      | Italy        | 0.17 (0.30)            |                       | 10/5                   | -0.11              | -0.31                                 | 35852             |
| Pati & Dash, 1990            | India        |                        | 0.25 (0.06)           | 36/36                  | -2.01              | -1.50                                 | 353               |
| Pauli et al., 2005           | Germany      | 0.32 (0.30)            |                       | 5/11                   | 0.06               | 0.81                                  | 34166             |
| Paulo et al., 2011           | Portugal     | 0.07 (0.01)            |                       | 77/212                 | 0.76               | 0.05                                  | 22540             |
| Pauls et al., 2013           | Germany      |                        | 0.05 (0.01)           | 330/366                | 0.35               | 1.32                                  | 44011             |
| Pavlik et al., 2013          | USA          | 0.17 (0.03)            | -0.12 (0.02)          | 63/135                 | 0.91               | 1.08                                  | 51433             |
| Payne et al., 2006           | USA          |                        | -0.08 (0.08)          | 27/29                  | 0.85               | 1.19                                  | 44308             |
| Peavy et al., 2012           | USA          | 0.44 (0.25)            |                       | 5/20                   | 0.92               | 1.08                                  | 49782             |
| Pedersen et al., 2012        | Denmark      | 0.41 (0.06)            |                       | 33/39                  | 0.84               | 1.22                                  | 61304             |
| Pena-Casanova et al., 2009   | Spain        | 0.02 (0.01)            | -0.11 (0.01)          | 137/203                | 0.25               | 0.56                                  | 35579             |
| Pérez-Carpinell et al., 2008 | Spain        |                        | 0.08 (0.04)           | 50/50                  | 0.13               | 0.49                                  | 32709             |
| Pérez-Carpinell et al., 2006 | Spain        |                        | 0.13 (0.08)           | 25/25                  | -0.09              | 0.36                                  | 26511             |
| Perrig-Chiello et al., 2000  | Switzerland  | 0.04 (0.02)            |                       | 109/65                 | -0.27              | 1.13                                  | 40577             |
| Persinger & Richards, 1995   | Canada       | 0.89 (0.11)            |                       | 20/20                  | 0.59               | 0.77                                  | 19859             |
| Phillips & Fox, 1998         | UK           | -0.06 (0.07)           |                       | 15/15                  | 0.70               | 0.57                                  | 24803             |
| Phillips et al., 2010        | UK           | 0.55 (0.07)            | 0.26 (0.07)           | 31/31                  | 0.74               | 1.08                                  | 37166             |
| Phillips et al., 2011        | UK           | 0.05 (0.24)            |                       | 5/28                   | 0.80               | 1.11                                  | 38293             |
| Pickel, 2009                 | USA          |                        | 0.16 (0.02)           | 96/211                 | 0.89               | 1.21                                  | 48401             |
| Piper et al., 2011           | USA          |                        | 0.55 (0.03)           | 67/61                  | 0.93               | 1.12                                  | 48374             |
| Pontón et al., 1996          | USA          | 0.04 (0.01)            | -0.15 (0.01)          | 120/180                | 0.64               | 1.24                                  | 28782             |
| Portin et al., 1995          | Finland      | 0.51 (0.01)            |                       | 143/179                | 0.58               | 0.22                                  | 20306             |
| Postma et al., 1998          | Netherlands  |                        | -0.86 (0.11)          | 20/20                  | -0.06              | 0.56                                  | 26405             |
| Postma et al., 1999          | Netherlands  |                        | -0.72 (0.08)          | 23/34                  | -0.02              | 0.65                                  | 27534             |
| Postma et al., 2003          | Netherlands  | 0.04 (0.06)            | -0.17 (0.06)          | 32/32                  | 0.17               | 0.94                                  | 28817             |
| Potts et al., 1986           | USA          | -0.36 (0.03)           |                       | 72/72                  | 0.72               | 1.11                                  | 18269             |



| Study                           | Country     | d Verbal<br>(variance) | d Other<br>(variance) | N<br>Males/<br>Females | Gender<br>Equality | Population<br>Education<br>Employment | GDP per<br>Capita |
|---------------------------------|-------------|------------------------|-----------------------|------------------------|--------------------|---------------------------------------|-------------------|
| Pouliot & Gagnon, 2005          | Canada      |                        | 0.07 (0.03)           | 60/60                  | 0.93               | 1.25                                  | 31980             |
| Rabitt et al., 1995             | UK          | 0.24 (0.00)            |                       | 583/1426               | 0.56               | 0.50                                  | 19709             |
| Ragland et al., 2000            | USA         | 0.70 (0.14)            | 0.90 (0.15)           | 16/14                  | 0.66               | 1.30                                  | 34621             |
| Rahman & Clarke, 2005           | UK          | 0.89 (0.11)            |                       | 19/20                  | 0.63               | 0.80                                  | 38306             |
| Rahman et al., 2003             | UK          | 0.12 (0.03)            | 0.22 (0.04)           | 60/60                  | 0.77               | 0.72                                  | 28301             |
| Rahman et al., 2005             | UK          | 0.74 (0.08)            | 0.48 (0.08)           | 26/26                  | 0.63               | 0.80                                  | 38306             |
| Rahman, Bakare, & Serinsu, 2011 | UK          |                        | 0.06 (0.07)           | 30/30                  | 0.80               | 1.11                                  | 38293             |
| Rahman, Newland, & Smyth, 2011  | UK          |                        | 0.18 (0.04)           | 70/35                  | 0.80               | 1.11                                  | 38293             |
| Rao & Moely, 1989               | India       | -0.78 (0.07)           |                       | 29/29                  | -1.98              | -1.52                                 | 361               |
| Rapeli et al., 2007             | Finland     | 0.31 (0.24)            | -0.13 (0.25)          | 8/9                    | 1.10               | 0.65                                  | 41121             |
| Rapisarda et al., 2013          | Singapore   | 0.07 (0.02)            | 0.27 (0.02)           | 87/84                  | 0.19               | 0.69                                  | 54451             |
| Raz et al., 2009                | USA         |                        | 0.25 (0.02)           | 64/125                 | 0.89               | 1.21                                  | 48401             |
| Razumnikova & Vol'f, 2007       | Russia      | 1.23 (0.15)            |                       | 16/16                  | 0.69               | 0.72                                  | 6920              |
| Read et al., 2006               | Sweden      | 0.25 (0.00)            |                       | 561/799                | 1.53               | 1.35                                  | 43085             |
| Rehman & Herlitz, 2006          | Sweden      | -0.03 (0.02)           | 0.38 (0.02)           | 88/109                 | 1.53               | 1.35                                  | 43085             |
| Rehman & Herlitz, 2007          | Sweden      | 0.24 (0.02)            | 0.44 (0.02)           | 107/112                | 1.49               | 1.30                                  | 46256             |
| Reijmer et al., 2013            | Netherlands | 0.26 (0.12)            |                       | 21/14                  | 0.53               | 1.23                                  | 49475             |
| Reis et al., 2013               | USA         | 0.54 (0.00)            |                       | 1132/1388              | 0.91               | 1.08                                  | 51433             |
| Reiswich et al., 2012           | Germany     |                        | -0.40 (0.09)          | 20/27                  | 0.34               | 1.33                                  | 45936             |
| Resmini et al., 2012            | Spain       | 0.50 (0.15)            | 0.20 (0.15)           | 9/25                   | 0.56               | 0.66                                  | 31832             |
| Ridout et al., 2009             | UK          |                        | -0.81 (0.34)          | 4/14                   | 0.68               | 1.04                                  | 45195             |
| Rizk-Jackson et al., 2006       | USA         |                        | -0.23 (0.16)          | 14/13                  | 0.85               | 1.19                                  | 44308             |
| Robinson et al., 1996           | USA         | 0.15 (0.03)            |                       | 78/61                  | 0.64               | 1.24                                  | 28782             |
| Romano et al., 2014             | Italy       | 0.32 (0.11)            | -0.05 (0.11)          | 18/19                  | -0.02              | -0.22                                 | 35368             |
| Rosenbloom et al., 2005         | USA         |                        | 0.28 (0.08)           | 21/29                  | 0.81               | 1.19                                  | 41922             |
| Rothen & Meier, 2009            | Switzerland |                        | -0.04 (0.31)          | 6/7                    | 0.25               | 1.61                                  | 72120             |
| Rucklidge, 2006                 | New Zealand | 0.28 (0.06)            | 0.04 (0.06)           | 30/35                  | 0.96               | 1.12                                  | 27751             |
| Ruff et al., 1988               | USA         | 0.45 (0.03)            |                       | 68/72                  | 0.77               | 1.12                                  | 20101             |
| Ruffieux et al., 2010           | Cameroon    | 0.22 (0.04)            |                       | 53/67                  | 0.01               | 0.03                                  | 1165              |
| Ruggiero et al., 2008           | Italy       |                        | -0.62 (0.03)          | 46/46                  | -0.24              | -0.35                                 | 37699             |
| Ruiz de Azua et al., 2013       | Spain       | 0.29 (0.11)            |                       | 23/15                  | 0.60               | 0.68                                  | 28648             |

| Study                       | Country     | d Verbal<br>(variance) | d Other<br>(variance) | N<br>Males/<br>Females | Gender<br>Equality | Population<br>Education<br>Employment | GDP per<br>Capita |
|-----------------------------|-------------|------------------------|-----------------------|------------------------|--------------------|---------------------------------------|-------------------|
| Rupp et al., 2006           | Germany     | 0.60 (0.14)            |                       | 16/14                  | 0.19               | 0.96                                  | 34697             |
| Sabia et al., 2009          | UK          | 0.05 (0.00)            |                       | 3937/1613              | 0.68               | 1.04                                  | 45195             |
| Said et al., 1990           | Australia   | 0.26 (0.08)            |                       | 25/28                  | 0.24               | 0.78                                  | 17811             |
| Salthouse & Siedlecki, 2007 | USA         | 0.26 (0.01)            | 0.09 (0.01)           | 102/225                | 0.85               | 1.21                                  | 46437             |
| Santos et al., 2005         | Brazil      |                        | 0.00 (0.03)           | 64/63                  | 0.62               | -0.24                                 | 3596              |
| Santos et al., 2013         | Portugal    | -0.02 (0.01)           |                       | 226/261                | 0.75               | 0.04                                  | 20577             |
| Savage & Gouvier, 1992      | USA         | 0.06 (0.03)            |                       | 66/68                  | 0.79               | 1.13                                  | 24405             |
| Savaskan et al., 2007       | Switzerland |                        | -0.51 (0.23)          | 9/9                    | 0.11               | 1.35                                  | 57349             |
| Scanlon Jones, 1984         | USA         |                        | 0.30 (0.01)           | 234/225                | 0.60               | 1.10                                  | 15561             |
| Schaefer et al., 2013       | Switzerland |                        | -0.36 (0.11)          | 17/20                  | 0.31               | 1.79                                  | 83209             |
| Schatz et al., 2012         | USA         | 0.15 (0.00)            | -0.01 (0.00)          | 1426/726               | 0.92               | 1.08                                  | 49782             |
| Schirmer et al., 2013       | Singapore   | 0.05 (0.04)            |                       | 48/48                  | 0.19               | 0.69                                  | 54451             |
| Schmitzer-Torbert, 2007     | USA         |                        | -0.03 (0.04)          | 22/23                  | 0.85               | 1.21                                  | 46437             |
| Schofield et al., 2012      | Australia   | 0.54 (0.17)            |                       | 9/20                   | 1.01               | 1.10                                  | 62217             |
| Schretlen et al., 2007      | USA         | 0.32 (0.04)            | 0.20 (0.04)           | 49/48                  | 0.85               | 1.21                                  | 46437             |
| Schwartz & Philippe, 1991   | USA         |                        | 0.72 (0.02)           | 102/102                | 0.84               | 1.14                                  | 23954             |
| Seasmon et al., 2002        | USA         | -0.02 (0.04)           |                       | 50/50                  | 0.69               | 1.27                                  | 37274             |
| Segalàs et al., 2010        | Spain       | 0.31 (0.09)            | -0.55 (0.09)          | 31/19                  | 0.40               | 0.60                                  | 32333             |
| Segura et al., 2009         | Spain       | 0.38 (0.12)            | 0.72 (0.12)           | 18/17                  | 0.25               | 0.56                                  | 35579             |
| Serra et al., 2010          | Italy       | 0.18 (0.18)            |                       | 12/11                  | -0.15              | -0.32                                 | 36977             |
| Sharps et al., 1993         | USA         |                        | 0.01 (0.14)           | 8/8                    | 0.74               | 1.17                                  | 25493             |
| Shi et al., 2012            | China       | 0.14 (0.02)            |                       | 90/156                 | 0.25               | 0.32                                  | 5574              |
| Shichita et al., 1986       | Japan       |                        | -0.40 (0.01)          | 145/157                | -0.39              | 0.19                                  | 11466             |
| Silverman et al., 2007      | Argentina   |                        | 0.41 (0.02)           | 164/103                | 0.19               | 0.16                                  | 6640              |
| Silverman et al., 2007      | Australia   |                        | 0.29 (0.00)           | 4717/4435              | 0.80               | 1.01                                  | 36085             |
| Silverman et al., 2007      | Austria     |                        | 0.14 (0.01)           | 203/173                | -0.50              | 0.37                                  | 40431             |
| Silverman et al., 2007      | Belgium     |                        | 0.46 (0.00)           | 871/615                | 0.39               | 0.21                                  | 38852             |
| Silverman et al., 2007      | Brazil      |                        | 0.21 (0.01)           | 197/138                | 0.67               | -0.13                                 | 5808              |
| Silverman et al., 2007      | Bulgaria    |                        | 0.34 (0.01)           | 177/187                | 0.95               | 0.09                                  | 4456              |
| Silverman et al., 2007      | Canada      |                        | 0.34 (0.00)           | 6750/6502              | 1.00               | 1.27                                  | 40387             |
| Silverman et al., 2007      | China       |                        | 0.18 (0.01)           | 215/188                | 0.13               | 0.40                                  | 2082              |

| Study                  | Country        | d Verbal<br>(variance) | d Other<br>(variance) | N<br>Males/<br>Females | Gender<br>Equality | Population<br>Education<br>Employment | GDP per<br>Capita |
|------------------------|----------------|------------------------|-----------------------|------------------------|--------------------|---------------------------------------|-------------------|
| Silverman et al., 2007 | Czech Republic |                        | 0.38 (0.02)           | 167/113                | 0.37               | 0.91                                  | 15159             |
| Silverman et al., 2007 | Denmark        |                        | 0.21 (0.00)           | 447/421                | 0.72               | 1.28                                  | 52041             |
| Silverman et al., 2007 | Finland        |                        | 0.44 (0.00)           | 1016/814               | 1.10               | 0.65                                  | 41121             |
| Silverman et al., 2007 | France         |                        | 0.20 (0.00)           | 623/446                | 0.35               | 0.34                                  | 36545             |
| Silverman et al., 2007 | Germany        |                        | 0.39 (0.00)           | 985/650                | 0.23               | 1.05                                  | 36448             |
| Silverman et al., 2007 | Greece         |                        | 0.40 (0.00)           | 456/432                | -0.31              | 0.11                                  | 24801             |
| Silverman et al., 2007 | Hungary        |                        | 0.30 (0.02)           | 108/115                |                    |                                       |                   |
| Silverman et al., 2007 | Iceland        |                        | 0.32 (0.02)           | 105/110                | 1.26               | 1.50                                  | 56097             |
| Silverman et al., 2007 | India          |                        | 0.22 (0.00)           | 2670/699               | -2.80              | -1.16                                 | 817               |
| Silverman et al., 2007 | Ireland        |                        | 0.26 (0.00)           | 2868/2668              | 0.85               | 0.78                                  | 54286             |
| Silverman et al., 2007 | Israel         |                        | 0.09 (0.01)           | 244/163                | 0.90               | 0.75                                  | 21905             |
| Silverman et al., 2007 | Italy          |                        | 0.32 (0.01)           | 279/199                | -0.27              | -0.35                                 | 33411             |
| Silverman et al., 2007 | Japan          |                        | 0.28 (0.01)           | 314/189                | 0.10               | 0.75                                  | 34076             |
| Silverman et al., 2007 | Malaysia       |                        | 0.23 (0.01)           | 330/300                | -0.57              | -0.30                                 | 6195              |
| Silverman et al., 2007 | Mexico         |                        | 0.29 (0.01)           | 241/154                | -0.68              | -0.42                                 | 8666              |
| Silverman et al., 2007 | Netherlands    |                        | 0.37 (0.00)           | 1378/1030              | 0.36               | 1.03                                  | 44454             |
| Silverman et al., 2007 | New Zealand    |                        | 0.43 (0.00)           | 1089/1070              | 1.05               | 1.15                                  | 26671             |
| Silverman et al., 2007 | Norway         |                        | 0.36 (0.01)           | 392/287                | 1.09               | 1.25                                  | 74115             |
| Silverman et al., 2007 | Philippines    |                        | 0.24 (0.01)           | 194/233                | 0.35               | -0.50                                 | 1395              |
| Silverman et al., 2007 | Poland         |                        | 0.37 (0.01)           | 236/254                | 0.45               | 0.05                                  | 9000              |
| Silverman et al., 2007 | Portugal       |                        | 0.23 (0.01)           | 223/167                | 0.54               | -0.02                                 | 19821             |
| Silverman et al., 2007 | Romania        |                        | 0.10 (0.01)           | 192/195                | 0.14               | -0.05                                 | 5829              |
| Silverman et al., 2007 | Singapore      |                        | 0.30 (0.00)           | 1110/1233              | -0.44              | 0.18                                  | 33580             |
| Silverman et al., 2007 | Slovenia       |                        | 0.20 (0.02)           | 148/113                | 0.67               | 0.71                                  | 19726             |
| Silverman et al., 2007 | South Africa   |                        | 0.23 (0.01)           | 256/156                | 0.42               | -0.85                                 | 5668              |
| Silverman et al., 2007 | Spain          |                        | 0.30 (0.00)           | 543/337                | 0.03               | 0.43                                  | 28483             |
| Silverman et al., 2007 | Sweden         |                        | 0.33 (0.00)           | 939/451                | 1.49               | 1.30                                  | 46256             |
| Silverman et al., 2007 | Switzerland    |                        | 0.34 (0.01)           | 366/228                | 0.11               | 1.35                                  | 57349             |
| Silverman et al., 2007 | Turkey         |                        | 0.35 (0.00)           | 709/659                | -2.12              | -1.86                                 | 7727              |
| Silverman et al., 2007 | UK             |                        | 0.28 (0.00)           | 46763/45928            | 0.61               | 0.94                                  | 42534             |

| Study                  | Country            | d Verbal<br>(variance) | d Other<br>(variance) | N<br>Males/<br>Females | Gender<br>Equality | Population<br>Education<br>Employment | GDP per<br>Capita |
|------------------------|--------------------|------------------------|-----------------------|------------------------|--------------------|---------------------------------------|-------------------|
|                        | United Arab        |                        |                       |                        |                    |                                       |                   |
| Silverman et al., 2007 | Emirates           |                        | 0.31 (0.01)           | 194/133                | 0.33               | 0.74                                  | 42950             |
| Silverman et al., 2007 | USA                |                        | 0.34 (0.00)           | 51084/45265            | 0.85               | 1.21                                  | 46437             |
| Simons et al., 2004    | USA                | -0.33 (0.08)           | 0.68 (0.09)           | 20/39                  | 0.78               | 1.21                                  | 39677             |
| Simpson et al., 2005   | Ireland            |                        | -0.25 (0.01)          | 196/191                | 0.74               | 0.52                                  | 47641             |
| Skjerve et al., 2007   | Norway             | -0.05 (0.06)           |                       | 27/39                  | 1.09               | 1.25                                  | 74115             |
| Slegers et al., 2011   | Netherlands        | 0.36 (0.00)            |                       | 613/641                | 0.49               | 1.18                                  | 50341             |
| Slone et al., 2000     | USA                |                        | 0.24 (0.04)           | 35/94                  | 0.66               | 1.30                                  | 34621             |
| Smeets et al., 2006    | Netherlands        | -0.28 (0.14)           |                       | 14/15                  | 0.34               | 0.98                                  | 41577             |
| Smith et al., 2011     | Canada             | 0.67 (0.12)            |                       | 14/26                  | 1.11               | 1.33                                  | 47446             |
| Smith & Fein, 2010     | USA                |                        | 0.40 (0.07)           | 33/25                  | 0.92               | 1.17                                  | 47002             |
| Smits et al., 1997     | Netherlands        | 0.11 (0.04)            |                       | 52/48                  | -0.10              | 0.44                                  | 28699             |
| Snitz et al., 2009     | USA                | 0.52 (0.00)            | -0.38 (0.00)          | 1650/1418              | 0.89               | 1.21                                  | 48401             |
| Snitz et al., 2010     | USA                |                        | 0.21 (0.00)           | 743/1178               | 0.92               | 1.17                                  | 47002             |
| Soares et al., 2012    | Brazil             | 0.15 (0.01)            |                       | 107/195                | 0.81               | -0.12                                 | 13039             |
| Sobal & Juhasz, 1977   | USA                | 1.28 (0.05)            |                       | 48/48                  | 0.47               | 1.00                                  | 8611              |
| Söderlund et al., 2006 | Germany            | 0.08 (0.03)            |                       | 75/83                  | 0.19               | 0.96                                  | 34697             |
| Söderlund et al., 2006 | Italy              | 0.40 (0.04)            |                       | 52/48                  | -0.31              | -0.38                                 | 31959             |
| Söderlund et al., 2006 | Netherlands        | 0.22 (0.01)            |                       | 118/109                | 0.34               | 0.98                                  | 41577             |
| Söderlund et al., 2006 | Poland             | 0.14 (0.04)            |                       | 62/50                  | 0.48               | 0.09                                  | 7976              |
| Söderlund et al., 2006 | Spain              | -0.03 (0.04)           |                       | 51/42                  | -0.09              | 0.36                                  | 26511             |
| Söderlund et al., 2006 | Sweden             | 0.22 (0.03)            |                       | 64/69                  | 1.53               | 1.35                                  | 43085             |
| Söderlund et al., 2006 | UK                 | -0.08 (0.03)           |                       | 134/43                 | 0.57               | 0.87                                  | 40048             |
| Solowij et al., 2011   | Australia          | 0.06 (0.08)            |                       | 18/44                  | 1.00               | 1.09                                  | 51846             |
| Sommer et al., 2013    | Germany            |                        | 0.35 (0.01)           | 393/415                | 0.35               | 1.32                                  | 44011             |
| Song et al., 2012      | China              | 0.16 (0.08)            |                       | 26/26                  | 0.25               | 0.32                                  | 5574              |
| Sonnega et al., 2014   | USA                | 0.29 (0.00)            |                       | 9461/9060              | 0.70               | 1.18                                  | 26465             |
| Sosa et al., 2009      | China              | -0.16 (0.00)           |                       | 893/1132               | 0.19               | 0.36                                  | 3441              |
| Sosa et al., 2009      | Cuba               | 0.04 (0.00)            |                       | 933/1688               | -0.11              | -0.25                                 | 5386              |
| Sosa et al., 2009      | Dominican Republic | 0.19 (0.00)            |                       | 612/1157               | 0.57               | -0.33                                 | 4997              |
| Sosa et al., 2009      | India              | -0.17 (0.00)           |                       | 722/1099               | -2.89              | -1.27                                 | 1023              |

| Study                     | Country     | d Verbal<br>(variance) | d Other<br>(variance) | N<br>Males/<br>Females | Gender<br>Equality | Population<br>Education<br>Employment | GDP per<br>Capita |
|---------------------------|-------------|------------------------|-----------------------|------------------------|--------------------|---------------------------------------|-------------------|
| Sosa et al., 2009         | Mexico      | 0.30 (0.00)            |                       | 679/1144               | -0.51              | -0.39                                 | 9579              |
| Sosa et al., 2009         | Peru        | 0.25 (0.00)            |                       | 694/1073               | -0.08              | 0.84                                  | 4245              |
| Sosa et al., 2009         | Venezuela   | 0.37 (0.00)            |                       | 666/1160               | 0.49               | -0.22                                 | 11225             |
| Spiers et al., 2008       | USA         |                        | 0.79 (0.11)           | 20/20                  | 0.86               | 1.20                                  | 48062             |
| Squeglia et al., 2011     | USA         |                        | 0.19 (0.07)           | 31/24                  | 0.93               | 1.12                                  | 48374             |
| Stangor, 1988             | USA         |                        | 0.81 (0.08)           | 19/39                  | 0.77               | 1.12                                  | 20101             |
| Staresina et al., 2005    | Austria     | 0.02 (0.21)            |                       | 9/10                   | -0.58              | 0.19                                  | 36693             |
| Stein et al., 2012        | Germany     | 0.36 (0.00)            |                       | 474/976                | 0.34               | 1.33                                  | 45936             |
| Steptoe et al., 2013      | UK          | 0.15 (0.00)            |                       | 5024/6043              | 0.68               | 0.76                                  | 32575             |
| Stewart et al., 2001      | UK          | 0.18 (0.01)            |                       | 123/162                | 0.88               | 0.65                                  | 26401             |
| Stijntjes et al., 2013    | Netherlands | 0.62 (0.01)            |                       | 247/253                | 0.53               | 1.23                                  | 49475             |
| Stumpf, 1998              | USA         |                        | 0.16 (0.00)           | 1274/864               | 0.66               | 1.29                                  | 31573             |
| Stumpf & Jackson, 1994    | Germany     | 0.36 (0.00)            | 0.07 (0.00)           | 96968/90142            | -0.47              | 0.25                                  | 25489             |
| Su et al., 2007           | Taiwan      |                        | 0.17 (0.11)           | 16/21                  |                    |                                       |                   |
| Sunderaraman et al., 2013 | USA         | 0.98 (0.04)            |                       | 26/36                  | 0.91               | 1.08                                  | 51433             |
| Sung & Dawis, 1981        | USA         |                        | 0.04 (0.00)           | 464/545                | 0.42               | 1.07                                  | 12598             |
| Susilo et al., 2013       | USA         | 0.12 (0.00)            | 0.15 (0.00)           | 936/1095               | 0.91               | 1.08                                  | 51433             |
| Swan et al., 2005;        | USA         | 0.83 (0.02)            |                       | 196/60                 | 0.81               | 1.19                                  | 41922             |
| Takei et al., 2009        | Japan       | 0.36 (0.19)            |                       | 23/7                   | 0.12               | 0.83                                  | 37866             |
| Tamm et al., 2013         | Australia   | 0.72 (0.23)            |                       | 14/7                   | 1.02               | 1.09                                  | 67646             |
| Temple & Cornish, 1993    | UK          | 0.59 (0.03)            | 0.04 (0.03)           | 64/64                  | 0.53               | 0.52                                  | 20487             |
| Terry et al., 2013        | USA         | 0.38 (0.16)            | -0.07 (0.15)          | 10/19                  | 0.91               | 1.08                                  | 51433             |
| Thakur et al., 1981       | India       |                        | 1.11 (0.06)           | 40/40                  | -1.72              | -1.68                                 | 272               |
| Thomson et al., 2005      | UK          | -0.10 (0.01)           |                       | 222/310                | 0.63               | 0.80                                  | 38306             |
| Timothy, 2014             | USA         | 0.28 (0.00)            |                       | 1664/3124              | 0.90               | 1.06                                  | 52660             |
| Tippet et al., 2009       | Canada      |                        | -0.74 (0.18)          | 12/12                  | 1.05               | 1.35                                  | 46596             |
| Toomela, 2012             | Estonia     | 0.30 (0.03)            |                       | 80/55                  | 1.28               | 1.11                                  | 17454             |
| Torniainen et al., 2011   | Finland     | 0.48 (0.03)            |                       | 61/62                  | 1.12               | 0.66                                  | 46205             |
| Torrent et al., 2011      | Spain       | 0.75 (0.13)            |                       | 13/22                  | 0.50               | 0.63                                  | 30738             |
| Torres et al., 2013       | Brazil      | -0.45 (0.14)           |                       | 14/15                  | 0.81               | -0.14                                 | 12157             |
| Tottenham et al., 2003    | Canada      |                        | 0.73 (0.07)           | 31/31                  | 0.85               | 1.10                                  | 24168             |

| Study                             | Country        | d Verbal<br>(variance) | d Other<br>(variance) | N<br>Males/<br>Females | Gender<br>Equality | Population<br>Education<br>Employment | GDP per<br>Capita |
|-----------------------------------|----------------|------------------------|-----------------------|------------------------|--------------------|---------------------------------------|-------------------|
| Townes et al., 2008               | USA            | 0.01 (0.01)            |                       | 276/227                | 0.86               | 1.20                                  | 48062             |
| Trachtenberg et al., 2005         | Taiwan         | -0.26 (0.00)           |                       | 1202/1134              |                    |                                       |                   |
| Trahan & Quintana, 1990           | USA            | 0.21 (0.03)            | -0.18 (0.03)          | 70/70                  | 0.82               | 1.14                                  | 22922             |
| Tropp Sneider et al., 2011        | USA            |                        | -0.78 (0.27)          | 8/8                    | 0.93               | 1.12                                  | 48374             |
| Unsworth, 2010                    | USA            | 0.09 (0.03)            | 0.15 (0.03)           | 64/101                 | 0.92               | 1.17                                  | 47002             |
| Unterhalter et al., 2007          | UK             | 0.21 (0.11)            |                       | 20/20                  | 0.61               | 0.94                                  | 42534             |
| Unwerzagt et al., 2011            | USA            | 0.30 (0.02)            |                       | 74/107                 | 0.93               | 1.12                                  | 48374             |
| Uttl et al., 2002                 | USA            | 0.13 (0.01)            |                       | 174/177                | 0.69               | 1.27                                  | 37274             |
| Uttner et al., 2011               | Germany        | 0.47 (0.28)            | 0.07 (0.30)           | 8/7                    | 0.31               | 1.28                                  | 41788             |
| Vakil & Blachstein, 1994          | Israel         |                        | 0.29 (0.02)           | 103/87                 | 0.19               | 0.44                                  | 12531             |
| Vakil & Blachstein, 1997          | Israel         | 0.15 (0.01)            |                       | 257/271                | 0.43               | 0.53                                  | 19286             |
| Vakil et al., 2010                | Israel         | 0.31 (0.00)            |                       | 700/679                | 0.94               | 0.87                                  | 27796             |
| Valis et al., 2011                | Czech Republic | 1.35 (0.45)            | -0.74 (0.42)          | 7/5                    | 0.38               | 0.91                                  | 19764             |
| van Boxtel et al., 1996           | Netherlands    | 0.56 (0.05)            |                       | 40/40                  | -0.16              | 0.38                                  | 28885             |
| van der Werf et al., 2012         | Netherlands    | 0.47 (0.01)            |                       | 275/347                | 0.52               | 1.17                                  | 53537             |
| van Exel et al., 2002;            | Netherlands    | 0.35 (0.01)            |                       | 156/288                | 0.14               | 0.89                                  | 26584             |
| van Hooren et al., 2007           | Netherlands    | 0.50 (0.01)            |                       | 292/286                | 0.36               | 1.03                                  | 44454             |
| van Oostrom et al., 2012          | Netherlands    | 0.22 (0.01)            |                       | 181/323                | 0.52               | 1.17                                  | 53537             |
| Vanhoutte et al., 2012            | Belgium        | 0.60 (0.21)            |                       | 10/10                  | 0.49               | 0.23                                  | 47700             |
| Vaskinn et al., 2011              | Norway         | 0.40 (0.01)            |                       | 182/158                | 1.18               | 1.20                                  | 87646             |
| Veena et al., 2010                | India          |                        | 0.01 (0.01)           | 261/281                | -2.94              | -1.33                                 | 1125              |
| Veena et al., 2014                | India          | 0.01 (0.01)            |                       | 261/279                | -3.04              | -1.47                                 | 1456              |
| Venter & Louw, 2004               | South Africa   |                        | -0.04 (0.01)          | 191/192                | 0.35               | -1.05                                 | 3807              |
| Venter & Low, 2005                | South Africa   |                        | 0.13 (0.01)           | 112/96                 | 0.29               | -0.99                                 | 4901              |
| Verbaam et al., 2007              | Netherlands    | 0.99 (0.06)            |                       | 42/33                  | 0.36               | 1.03                                  | 44454             |
| Vilberg & Rugg, 2012              | USA            | -0.25 (0.23)           | -0.39 (0.23)          | 8/10                   | 0.92               | 1.08                                  | 49782             |
| Villardita et al., 1981           | Italy          | -0.06 (0.03)           | 0.15 (0.03)           | 68/54                  | -0.74              | -1.03                                 | 8429              |
| Vitulli & Henderson, 1994         | USA            |                        | -0.13 (0.05)          | 33/68                  | 0.70               | 1.18                                  | 26465             |
| Volf & Razumnikova, 2001          | Russia         | 1.46 (0.25)            |                       | 10/10                  | 0.47               | 0.60                                  | 1772              |
| Volz-Sidiropoulou & Gauggel, 2011 | Germany        | 0.54 (0.05)            |                       | 40/40                  | 0.31               | 1.28                                  | 41788             |
| Wagner et al., 2012               | Germany        | 0.42 (0.00)            |                       | 497/758                | 0.34               | 1.33                                  | 45936             |

| Study                       | Country     | d Verbal<br>(variance) | d Other<br>(variance) | N<br>Males/<br>Females | Gender<br>Equality | Population<br>Education<br>Employment | GDP per<br>Capita |
|-----------------------------|-------------|------------------------|-----------------------|------------------------|--------------------|---------------------------------------|-------------------|
| Wagovich et al., 2012       | USA         | 0.30 (0.27)            |                       | 6/10                   | 0.92               | 1.08                                  | 49782             |
| Wahlin et al., 2006         | USA         | 0.23 (0.01)            |                       | 146/240                | 0.85               | 1.19                                  | 44308             |
| Waldstein & I., 2004        | USA         | 0.15 (0.07)            | 0.29 (0.07)           | 30/26                  | 0.78               | 1.21                                  | 39677             |
| Walhovd et al., 2006        | Norway      | 0.56 (0.06)            |                       | 31/40                  | 1.07               | 1.25                                  | 66775             |
| Wang, 2012b                 | China       | 0.84 (0.09)            |                       | 23/28                  | 0.25               | 0.32                                  | 5574              |
| Wang, 2012a                 | China       |                        | 0.01 (0.05)           | 37/37                  | 0.25               | 0.32                                  | 5574              |
| Wang, 2013                  | China       |                        | 0.15 (0.04)           | 45/48                  | 0.24               | 0.31                                  | 6265              |
| Wang & Fu, 2009             | China       | 0.32 (0.10)            | 0.23 (0.11)           | 20/20                  | 0.19               | 0.36                                  | 3441              |
| Wang & Fu, 2010             | China       | 0.09 (0.03)            | 0.13 (0.03)           | 75/73                  | 0.22               | 0.35                                  | 3800              |
| Wang et al., 2013           | China       | -0.21 (0.00)           |                       | 744/719                | 0.24               | 0.31                                  | 6265              |
| Weintraub et al., 2009      | USA         | 0.25 (0.00)            |                       | 3154/6345              | 0.89               | 1.21                                  | 48401             |
| Weirich et al., 2011        | Germany     |                        | 0.47 (0.12)           | 17/19                  | 0.31               | 1.28                                  | 41788             |
| Weiss et al., 2006          | Austria     | 0.11 (0.05)            |                       | 40/40                  | -0.56              | 0.32                                  | 38242             |
| Wesson Ashford et al., 2014 | USA         | 0.00 (0.01)            |                       | 272/596                | 0.90               | 1.06                                  | 52660             |
| West et al., 1992           | USA         | 0.32 (0.00)            | 0.23 (0.00)           | 1000/1343              | 0.79               | 1.13                                  | 24405             |
| West et al., 2002           | USA         |                        | 0.61 (0.02)           | 37/43                  | 0.69               | 1.27                                  | 37274             |
| Wicks et al., 2009          | UK          | -0.07 (0.12)           |                       | 22/13                  | 0.68               | 1.04                                  | 45195             |
| Widmann et al., 2012        | Germany     | 0.63 (0.14)            | -0.06 (0.13)          | 14/17                  | 0.34               | 1.33                                  | 45936             |
| Wiebe & Watkins, 1980       | USA         | 0.13 (0.02)            | 0.12 (0.02)           | 100/100                | 0.43               | 1.05                                  | 11696             |
| Wiederholt et al., 1993     | USA         | 0.61 (0.01)            | -0.19 (0.01)          | 530/610                | 0.74               | 1.17                                  | 25493             |
| Wilhelm & Van Klink, 2007   | Netherlands |                        | 0.02 (0.02)           | 76/96                  | 0.36               | 1.03                                  | 44454             |
| Wingbermhühle et al., 2012  | Netherlands | 0.61 (0.10)            | -0.27 (0.10)          | 17/25                  | 0.52               | 1.17                                  | 53537             |
| Woicik et al., 2009         | USA         | 0.07 (0.11)            |                       | 45/11                  | 0.89               | 1.21                                  | 48401             |
| Wolf et al., 2001           | Germany     | 0.72 (0.14)            |                       | 25/11                  | -0.60              | 0.52                                  | 23719             |
| Wolff et al., 2013          | Germany     |                        | 0.10 (0.07)           | 28/28                  | 0.35               | 1.32                                  | 44011             |
| Woo et al., 2012            | South Korea | 0.07 (0.02)            | -0.11 (0.02)          | 111/79                 | -0.51              | 0.37                                  | 24156             |
| Woolley et al., 2010        | Belgium     |                        | -0.54 (0.19)          | 11/11                  | 0.47               | 0.25                                  | 44881             |
| Xu et al., 2011             | China       | 0.15 (0.00)            |                       | 6798/18168             | 0.25               | 0.33                                  | 4515              |
| Yang et al., 2012           | China       | -0.32 (0.00)           |                       | 837/989                | 0.25               | 0.32                                  | 5574              |
| Yang Zhang et al., 2012     | USA         |                        | -0.02 (0.01)          | 589/215                | 0.92               | 1.08                                  | 49782             |
| Ye et al., 2012             | South Korea | 0.29 (0.01)            | -0.46 (0.01)          | 245/685                | -0.51              | 0.37                                  | 24156             |

| Study                      | Country     | d Verbal<br>(variance) | d Other<br>(variance) | N<br>Males/<br>Females | Gender<br>Equality | Population<br>Education<br>Employment | GDP per<br>Capita |
|----------------------------|-------------|------------------------|-----------------------|------------------------|--------------------|---------------------------------------|-------------------|
| Young, 1979                | USA         | -0.09 (0.14)           | -0.90 (0.14)          | 16/16                  | 0.45               | 1.03                                  | 10587             |
| Young & Wilson, 1994       | USA         | 0.06 (0.08)            |                       | 24/28                  | 0.70               | 1.18                                  | 26465             |
| Youngjohn et al., 1991     | USA         | 0.31 (0.00)            |                       | 689/845                | 0.84               | 1.14                                  | 23954             |
| Ystad et al., 2009         | Norway      | 0.81 (0.03)            |                       | 50/120                 | 1.16               | 1.36                                  | 96881             |
| Yurgelun-Todd et al., 2003 | USA         |                        | -0.08 (0.12)          | 13/24                  | 0.73               | 1.25                                  | 38166             |
| Zahodne et al., 2014       | USA         | 0.16 (0.00)            |                       | 328/726                | 0.90               | 1.06                                  | 52660             |
| Zanello et al., 2006       | Switzerland | -0.14 (0.20)           |                       | 9/11                   | 0.08               | 1.22                                  | 54798             |
| Zehnder et al., 2009       | Switzerland | 0.60 (0.02)            |                       | 136/88                 | 0.25               | 1.61                                  | 72120             |
| Wang et al., 2010          | China       | 0.24 (0.20)            |                       | 10/10                  | 0.22               | 0.35                                  | 3800              |
| Zhang et al., 2012         | China       |                        | -1.18 (0.33)          | 21/4                   | 0.25               | 0.32                                  | 5574              |
| Zhong et al., 2014         | USA         | 0.61 (0.00)            |                       | 593/786                | 0.90               | 1.06                                  | 52660             |
| Zimmerman et al., 2012     | USA         | 0.29 (0.01)            |                       | 208/341                | 0.92               | 1.08                                  | 49782             |
| Zoladz et al., 2013        | USA         | 0.17 (0.09)            |                       | 18/30                  | 0.91               | 1.08                                  | 51433             |

Studies included in the database with country of study, effect size  $d$  (variance) of *Verbal* and *Other* episodic memory tasks, total number of males/females participating in the study, together with country- and time-specific measures indicative of gender equality in educational and occupational opportunities, population education level and labor force participation, and GDP per capita. Explanation of headings: Country = Country of study;  $d$  (variance) = Cohen's  $d$  and variance of categories *Verbal* and *Other* episodic memory tasks (when combining all effect sizes within a study using verbal material or other, non-verbal, material); N Males/Females = The total number of males/females participating in the study; Gender equality = A country- and time-specific measure indicative of gender equality in educational and occupational opportunities; Population Education Employment = A country- and time-specific measure indicative of education level and labor force participation; GDP per Capita = A country- and time-specific measure of economic activity in relation to the size of the population.
