# Supplementary material for: The magnitude of sex differences in verbal episodic memory increases with social progress: Data from 54 countries across 40 years
Source: PubMed Central journal article supplement (PMC6476491; doi:10.1371/journal.pone.0214945), 2019-04-22
Supplement: pone.0214945.s002.pdf [file pone.0214945.s002.pdf]

**Table S2. Summary table of additional sensitivity regression analyses.**

|                                  |                             | Simple<br>model 1 | Simple<br>model 2 | Simple<br>model 3 | Combined<br>model |
|----------------------------------|-----------------------------|-------------------|-------------------|-------------------|-------------------|
| Verbal, excluding<br>databases   |                             |                   |                   |                   |                   |
| Intercept                        |                             |                   |                   |                   |                   |
|                                  | Intercept estimate          | 0.21***           | 0.18***           | -0.47(*)          | 0.13              |
|                                  | Intercept standard<br>error | 0.02              | 0.03              | 0.28              | 0.39              |
| Gender Equality                  |                             |                   |                   |                   |                   |
|                                  | B estimate                  | 0.11***           |                   |                   | 0.04              |
|                                  | B standard error            | 0.03              |                   |                   | 0.04              |
| Population<br>Education and Work |                             |                   |                   |                   |                   |
|                                  | B estimate                  |                   | 0.15***           |                   | 0.11*             |
|                                  | B standard error            |                   | 0.03              |                   | 0.05              |
| GDP per capita                   |                             |                   |                   |                   |                   |
|                                  | B estimate                  |                   |                   | 0.07**            | 0.01              |
|                                  | B standard error            |                   |                   | 0.03              | 0.04              |
| Observations                     |                             | 220               | 220               | 220               | 220               |
| Multiple R <sup>2</sup>          |                             | 0.07              | 0.09              | 0.05              | 0.10              |
| Adjusted R <sup>2</sup>          |                             | 0.07              | 0.09              | 0.05              | 0.08              |
| Verbal, only<br>databases        |                             |                   |                   |                   |                   |
| Intercept                        |                             |                   |                   |                   |                   |
|                                  | Intercept estimate          | 0.10***           | 0.05*             | -1.00***          | -0.54**           |
|                                  | Intercept standard<br>error | 0.02              | 0.02              | 0.11              | 0.20              |
| Gender Equality                  |                             |                   |                   |                   |                   |
|                                  | B estimate                  | 0.12***           |                   |                   | 0.04              |
|                                  | B standard error            | 0.02              |                   |                   | 0.03              |
| Population<br>Education and Work |                             |                   |                   |                   |                   |
|                                  | B estimate                  |                   | 0.15***           |                   | 0.08**            |
|                                  | B standard error            |                   | 0.02              |                   | 0.03              |
| GDP per capita                   |                             |                   |                   |                   |                   |
|                                  | B estimate                  |                   |                   | 0.11***           | 0.06**            |
|                                  | B standard error            |                   |                   | 0.01              | 0.02              |
| Observations                     |                             | 64                | 64                | 64                | 64                |
| Multiple R <sup>2</sup>          |                             | 0.28              | 0.43              | 0.35              | 0.52              |
| Adjusted R <sup>2</sup>          |                             | 0.27              | 0.42              | 0.34              | 0.49              |

Summary table of regression analyses for *Verbal* excluding data from databases used by Weber et al., (2014) and Bonsang et al. (2017), and for *Verbal* only containing data used by Weber et al., (2014) and Bonsang et al. (2017). (\*)  $p < .10$ ; \*  $p < .05$ ; \*\*  $p < .01$ ; \*\*\*  $p < .001$ .
